# Supplementary material for: Genome-wide CRISPR screen identifies host dependency factors for influenza A virus infection
Source: Nat Commun. 2020 Jan 9;11:164. doi: 10.1038/s41467-019-13965-x (PMC6952391; doi:10.1038/s41467-019-13965-x)
Supplement: Supplementary file 4 — Supplementary Data 1 [file 41467_2019_13965_MOESM4_ESM.xlsx]

## Sheet: Primary screen
gene	p-value	fdr
ATP6V1F	<10E-12	<10E-12
ATP6V1B2	<10E-12	<10E-12
ATP6V0B	<10E-12	<10E-12
ATP6V0C	<10E-12	<10E-12
WDR7	<10E-12	<10E-12
PCID2	<10E-12	<10E-12
SLC35A1	<10E-12	<10E-12
ATP6AP2	<10E-12	<10E-12
ATP6AP1	<10E-12	<10E-12
RABGGTB	<10E-12	<10E-12
CMAS	<10E-12	<10E-12
ATP6V1A	<10E-12	<10E-12
ATP6V1E1	5.14e-08	7.69e-05
COG3	2.06e-07	0.000285714
DBR1	4.11e-07	0.000533333
TNFAIP3	5.14e-07	0.000625
SRP14	1.13e-06	0.00129412
GGPS1	2.26e-06	0.00244444
ATP6V1H	3.5e-06	0.00357895
YKT6	8.94e-06	0.00838095
ATP6V1G1	9.05e-06	0.00838095
SCAP	1.07e-05	0.00926087
ATP6V1C1	1.09e-05	0.00926087
SRP54	1.19e-05	0.00966667
COG4	1.81e-05	0.0138077
CCDC115	1.85e-05	0.0138077
EEF2	2.12e-05	0.0152593
COPA	2.3e-05	0.0159643
TMEM199	2.63e-05	0.0176552
SRPRB	2.84e-05	0.0184
DPAGT1	3.08e-05	0.0193548
TPR	3.6e-05	0.021697
TRAPPC4	3.68e-05	0.021697
MCM3AP	4e-05	0.0228824
BCL2L1	4.32e-05	0.0237778
SAP30BP	4.4e-05	0.0237778
PREB	4.76e-05	0.025027
NUDT21	5.07e-05	0.0259474
TRAPPC3	5.97e-05	0.0297692
TRAPPC8	6.47e-05	0.031475
COPG1	0.00010219	0.0484878

## Sheet: Secondary screen
gene	screen remainder p (leaving out strongest sgRNA)	screen p	validation remainder p (leaving out strongest sgRNA)	validation p	combined remainder p (leaving out strongest sgRNA)	combined p	multiple sgRNA support (combined fdr <0.05 and combined remainder p<0.05	combined fdr
ATP6V0B	4.50265e-09	9.3e-07	3.49748e-08	6.19434e-09	2.10732e-14	1.22561e-13	TRUE	3.06966e-12
ATP6V0C	4.50265e-09	5.8e-07	3.49748e-08	4.45993e-07	2.10732e-14	1.07613e-11	TRUE	3.06966e-12
ATP6V1B2	4.50265e-09	5.6e-07	3.49748e-08	6.19434e-09	2.10732e-14	8.36761e-14	TRUE	3.06966e-12
ATP6V1F	4.50265e-09	5.9e-07	3.49748e-08	2.91134e-07	2.10732e-14	6.65585e-12	TRUE	3.06966e-12
PCID2	4.50265e-09	3.51e-06	3.49748e-08	4.7077e-07	2.10732e-14	4.01694e-11	TRUE	3.06966e-12
WDR7	4.50265e-09	6.5e-07	3.49748e-08	6.19434e-09	2.10732e-14	9.35583e-14	TRUE	3.06966e-12
ATP6AP1	9.0053e-09	5.76e-06	3.49748e-08	4.02632e-07	3.3273e-14	4.81491e-11	TRUE	3.63507e-12
ATP6AP2	9.0053e-09	4.98e-06	3.49748e-08	6.19434e-09	3.3273e-14	4.49746e-13	TRUE	3.63507e-12
ATP6V1A	4.95292e-08	3.74e-05	3.49748e-08	6.19434e-09	1.04882e-13	2.34964e-12	TRUE	9.16669e-12
SLC35A1	4.95292e-08	3.513e-05	3.49748e-08	1.23887e-07	1.04882e-13	5.2368e-11	TRUE	9.16669e-12
ATP6V1E1	9.45557e-08	9.285e-05	3.49748e-08	6.81378e-08	1.6376e-13	6.14041e-11	TRUE	1.30115e-11
SRP14	1.98117e-06	0.0004737	3.49748e-08	1.31506e-05	1.45625e-12	5.89689e-08	TRUE	1.06064e-10
ATP6V1G1	1.30982e-05	0.00272821	3.49748e-08	4.76965e-07	6.1939e-12	8.83336e-09	TRUE	4.16421e-10
ATP6V1H	6.15963e-06	0.00167692	6.99496e-08	2.29439e-05	7.32207e-12	2.88697e-07	TRUE	4.57107e-10
ATP6V1C1	1.63942e-05	0.00114753	6.99496e-08	1.10507e-05	1.55643e-11	9.90272e-08	TRUE	9.06881e-10
RABGGTB	9.0053e-09	4.16e-06	3.27714e-05	0.000540432	1.62871e-10	1.99144e-07	TRUE	8.89683e-09
CCDC115	2.49852e-05	0.00637081	1.15417e-06	0.000107323	4.53998e-10	4.25066e-06	TRUE	2.33409e-08
ATP6V1D	0.00273016	0.130779	6.99496e-08	2.97514e-05	1.35669e-09	2.75113e-05	TRUE	6.5875e-08
DBR1	1.10765e-06	0.00019708	6.21153e-05	0.000852509	5.97921e-09	3.4592e-06	TRUE	2.72583e-07
COG3	4.5927e-07	7.577e-05	9.69852e-05	0.00102799	6.23759e-09	2.41844e-06	TRUE	2.72583e-07
DPAGT1	3.9862e-05	0.0100754	3.07079e-05	0.000588072	2.52114e-08	3.54101e-05	TRUE	1.04928e-06
TMEM199	3.46839e-05	0.00164969	3.71083e-05	0.000484844	2.85369e-08	7.4339e-06	TRUE	1.13369e-06
SRPRB	3.68587e-05	0.00335883	7.95327e-05	0.00289305	7.2063e-08	8.84745e-05	TRUE	2.7384e-06
MCM3AP	5.01955e-05	0.00351855	0.000218698	0.00202704	2.89836e-07	6.13355e-05	TRUE	1.05549e-05
GGPS1	4.40359e-06	0.00024908	0.00128134	0.0154562	6.31964e-07	0.000147729	TRUE	2.20935e-05
COG4	2.4643e-05	0.0264353	0.000847055	0.00933949	9.8015e-07	0.0013185	TRUE	3.29481e-05
TPR	4.54678e-05	0.00356133	0.000732792	0.00911023	1.17562e-06	0.000342105	TRUE	3.80552e-05
RCC1	0.00312452	0.048087	5.82331e-05	0.00130848	1.2602e-06	0.00029325	TRUE	3.93361e-05
ATP6V0D1	0.0257878	0.269604	1.33954e-05	0.00188775	2.03423e-06	0.00247063	TRUE	6.13076e-05
SRP54	1.76549e-05	0.00146942	0.00377948	0.0180577	5.61021e-06	0.000467735	TRUE	0.000163444
TRAPPC8	7.70764e-05	0.00298421	0.00254393	0.0252081	7.54853e-06	0.00104965	TRUE	0.000210976
SCAP	1.57548e-05	0.00150803	0.00511244	0.0400675	7.93055e-06	0.00132064	TRUE	0.000210976
NSF	0.000404559	0.0191777	0.00117736	0.0135453	7.96591e-06	0.00157396	TRUE	0.000210976
SRP19	0.0027481	0.0683919	0.000474154	0.00436802	1.04814e-05	0.00128618	TRUE	0.000264868
YKT6	1.29766e-05	0.00421886	0.0068025	0.0342609	1.06069e-05	0.00185911	TRUE	0.000264868
ALG2	0.00260602	0.106095	0.000684457	0.00762482	1.50319e-05	0.00322063	TRUE	0.000357545
COG2	0.000435762	0.0220206	0.00194635	0.0265354	1.51363e-05	0.00361819	TRUE	0.000357545
NUDT21	6.23257e-05	0.00359972	0.00623017	0.0363579	2.13438e-05	0.00183744	TRUE	0.000486493
TRAPPC4	4.63683e-05	0.00916993	0.00709901	0.045746	2.17085e-05	0.0040653	TRUE	0.000486493
TRAPPC11	0.00187711	0.0663157	0.00192103	0.0148803	3.78369e-05	0.00420666	TRUE	0.000826736
CMTR1	0.00367048	0.0541015	0.00159775	0.0133777	4.85311e-05	0.00323649	TRUE	0.00103454
EEF2	2.83982e-05	0.00127278	0.0177098	0.0754682	5.9955e-05	0.00287343	TRUE	0.00124763
SYS1	0.00101948	0.0343872	0.00456894	0.0501609	7.0496e-05	0.00972721	TRUE	0.00143287
PREB	0.00994901	0.165848	0.00123636	0.0241547	7.60284e-05	0.0140925	TRUE	0.0015102
TRAPPC3	7.18803e-05	0.00574784	0.0162575	0.129097	8.39115e-05	0.012204	TRUE	0.00162975
NUP85	0.00320734	0.0330739	0.00344383	0.0163343	0.000104478	0.00279289	TRUE	0.00191086
ENY2	0.0102401	0.146142	0.00163972	0.0231167	0.000104615	0.0121505	TRUE	0.00191086
COG1	0.0110616	0.117618	0.00156341	0.043273	0.00010544	0.0188281	TRUE	0.00191086
SARS	0.0146289	0.307232	0.0012912	0.00729488	0.000107131	0.00905856	TRUE	0.00191086
SPCS3	0.000150807	0.0171142	0.0151738	0.0578772	0.000111156	0.00763633	TRUE	0.00194301
COPA	3.11358e-05	0.00558729	0.0267554	0.107997	0.000113823	0.009445	TRUE	0.00195062
TRAPPC5	0.000156129	0.026549	0.0162877	0.0872246	0.000124501	0.0158586	TRUE	0.00207803
SEC16A	0.000296716	0.0103537	0.0127701	0.0557592	0.000126013	0.00553235	TRUE	0.00207803
PAXBP1	0.00184178	0.0591018	0.00728952	0.0627041	0.000176012	0.0173799	TRUE	0.00284879
BET1	0.00353046	0.0900875	0.00548017	0.037163	0.000188843	0.0133153	TRUE	0.00300088
RABGGTA	0.000580653	0.0219616	0.0149454	0.0827348	0.000221517	0.0134292	TRUE	0.00341777
TRAPPC1	0.00040364	0.0108557	0.0174278	0.0823567	0.000222898	0.00920751	TRUE	0.00341777
EXOC4	0.00290798	0.280427	0.0074495	0.0524956	0.000238604	0.0452072	TRUE	0.00359551
TMEM38A	0.00295851	0.0517709	0.00770897	0.0557292	0.000251014	0.0140699	TRUE	0.00371842
COG8	0.00260513	0.112451	0.0084134	0.0621431	0.000257378	0.0262356	TRUE	0.00374913
CHMP6	0.00546283	0.117072	0.00648304	0.0622259	0.00030295	0.0270121	TRUE	0.00434063
MBTPS1	0.0127159	0.124978	0.00418617	0.0312731	0.000332325	0.01432	TRUE	0.0046847
SRRT	0.00189096	0.0192305	0.0124979	0.0588375	0.000342219	0.00831467	TRUE	0.00474761
POLR3A	0.0089974	0.153743	0.00610325	0.0261174	0.000393917	0.0142283	TRUE	0.00537943
SRP9	0.00203445	0.059375	0.0149112	0.0864414	0.000442859	0.0247866	TRUE	0.00595475
COPG1	0.000116285	0.00848107	0.0522886	0.18691	0.000562135	0.0243172	TRUE	0.00744403
RARS2	0.00161619	0.0278503	0.0251456	0.170778	0.000748782	0.0370455	TRUE	0.00976769
CSE1L	0.0104641	0.0861145	0.0103654	0.0448107	0.000784336	0.0156155	TRUE	0.010081
POLR3H	0.0125826	0.155625	0.00970397	0.0499035	0.000823254	0.0266899	TRUE	0.0104279
RRP12	0.00914518	0.140051	0.0162153	0.0540575	0.00119472	0.026672	TRUE	0.0145026
TUBGCP2	0.000224547	0.00550469	0.0768148	0.321316	0.00134286	0.0462298	TRUE	0.0160775
SNX18	0.00998429	0.17891	0.0174231	0.0660585	0.00136992	0.0388643	TRUE	0.0161714
VPS13D	0.00997411	0.0782353	0.0182665	0.112662	0.00144534	0.0390723	TRUE	0.0165361
ANKLE2	0.0145548	0.125626	0.0150741	0.0506907	0.0014768	0.0231201	TRUE	0.0165478
POP7	0.00694898	0.111452	0.0260555	0.0806713	0.0017641	0.0340724	TRUE	0.0192728
AFG3L2	0.0362674	0.344276	0.0116986	0.0445582	0.00209784	0.0474332	TRUE	0.0218275
MYH9	0.000284604	0.00931596	0.126256	0.276861	0.00320982	0.0447856	TRUE	0.0307822
EXOC2	0.0168949	0.172393	0.0278592	0.0729667	0.00324023	0.0416335	TRUE	0.0307822
SCFD1	0.000438202	0.0384974	0.0489111	0.266686	0.000943896	0.0764301	FALSE	0.0117852
VPS54	0.00751238	0.262177	0.0155266	0.110582	0.00100647	0.0841721	FALSE	0.0123896
TTC27	0.00774245	0.0699182	0.020145	0.15478	0.00138771	0.0524106	FALSE	0.0161714
GOSR2	0.00200064	0.0668175	0.0386476	0.165562	0.00145684	0.0552978	FALSE	0.0165361
SEZ6L	0.00842712	0.185347	0.0206557	0.0955527	0.00150356	0.0570161	FALSE	0.0166344
RNASEK	0.00525661	0.304193	0.0318107	0.423554	0.00191545	0.335476	FALSE	0.0206679
RPLP0	0.000907977	0.0293364	0.0639488	0.242445	0.00194331	0.0598048	FALSE	0.0207129
SEC13	0.0177689	0.146982	0.0177187	0.149669	0.00201179	0.0770189	FALSE	0.0211843
RPL6	0.000192227	0.00926487	0.108715	0.397191	0.00214999	0.0789227	FALSE	0.022107
SMARCB1	0.0081592	0.283415	0.0288347	0.0964402	0.00218468	0.0787906	FALSE	0.0222024
CCT4	0.00803652	0.144889	0.0315167	0.109877	0.00240804	0.055521	FALSE	0.0241911
POLE2	0.000163707	0.0201485	0.129037	0.327593	0.00265164	0.077865	FALSE	0.0263356
ACTB	0.0315431	0.726451	0.016847	0.0632593	0.00279337	0.15482	FALSE	0.0274315
NUP153	0.0140564	0.0777768	0.0293924	0.145977	0.00308072	0.0519609	FALSE	0.0299172
PKD1	0.00336098	0.0430792	0.0588835	0.231298	0.00329039	0.0668631	FALSE	0.0309226
SLC39A7	0.0113473	0.165397	0.0369708	0.102835	0.00355098	0.0566808	FALSE	0.0327241
TOP2A	0.00106703	0.0538662	0.0927979	0.443329	0.00355697	0.175137	FALSE	0.0327241
EIF2B4	0.00573858	0.0809378	0.0526749	0.173187	0.00375835	0.0644505	FALSE	0.0342166
SOCS3	0.0139196	0.134045	0.0368888	0.24725	0.00398809	0.125411	FALSE	0.0359339
RPN1	0.0382417	0.28899	0.0212991	0.0889701	0.00409426	0.0743879	FALSE	0.0365141
PLLP	0.00442514	0.0614591	0.0636327	0.28241	0.00418453	0.101165	FALSE	0.0369422
VHL	0.00298538	0.104879	0.0754778	0.205307	0.00431391	0.0896452	FALSE	0.0372975
TMEM258	0.00943251	0.0768595	0.0477652	0.151186	0.00435204	0.0537094	FALSE	0.0372975
SLC26A10	0.00287327	0.0493481	0.0770329	0.176771	0.00435279	0.0511604	FALSE	0.0372975
FAM25A	0.0128552	0.234096	0.0420471	0.197249	0.00444317	0.135429	FALSE	0.0374511
SFSWAP	0.0155585	0.246106	0.0383627	0.137195	0.00445643	0.0984928	FALSE	0.0374511
SFPQ	0.000734648	0.0253923	0.123355	0.325155	0.00460689	0.0843622	FALSE	0.0383469
TWISTNB	0.00105703	0.0183644	0.114086	0.458362	0.00479292	0.126432	FALSE	0.0395189
SART3	0.0155369	0.161691	0.0429628	0.141826	0.00508298	0.077252	FALSE	0.0412133
PLA2G10	0.00678232	0.194893	0.062502	0.146456	0.00509272	0.0898157	FALSE	0.0412133
CDK1	0.00853728	0.123943	0.0590543	0.242469	0.00535344	0.11787	FALSE	0.0429257
NXF1	0.000458613	0.0105861	0.156523	0.38232	0.00550333	0.0777097	FALSE	0.0430501
DAD1	0.00295252	0.0416305	0.0913038	0.419186	0.00555856	0.146989	FALSE	0.0430501
SCRT1	0.00223038	0.0804815	0.100387	0.347209	0.00556589	0.147766	FALSE	0.0430501
DYRK1A	0.0241677	0.334022	0.037027	0.141466	0.00557299	0.126415	FALSE	0.0430501
BRF2	0.00576035	0.291029	0.072498	0.226566	0.00566337	0.177388	FALSE	0.0430501
HAUS8	0.0229278	0.223374	0.0386436	0.0980355	0.00566448	0.0667959	FALSE	0.0430501
TBP	0.00393668	0.249641	0.0844704	0.22414	0.00573866	0.15975	FALSE	0.0432378
EXOC3	0.000351756	0.0380404	0.173924	0.429476	0.00588447	0.147357	FALSE	0.0439575
ZSCAN20	0.00408155	0.849192	0.0883268	0.747772	0.00620053	0.863735	FALSE	0.0459259
AARS	0.0330051	0.309736	0.0348353	0.249578	0.00632503	0.202138	FALSE	0.0464544
NCBP2	0.000460644	0.017051	0.173292	0.41524	0.00650547	0.10507	FALSE	0.0473815
RPN2	0.000287629	0.012407	0.194528	0.386105	0.00657361	0.0835582	FALSE	0.0474821
EIF2B3	0.029207	0.240278	0.041566	0.177321	0.00713007	0.124041	FALSE	0.0510794
GEMIN5	0.00351487	0.0300481	0.108764	0.450844	0.00767705	0.145807	FALSE	0.0540127
CSF2	0.0331584	0.336268	0.0415538	0.0953187	0.00770971	0.0895892	FALSE	0.0540127
NTNG2	0.0132872	0.292849	0.0658483	0.211618	0.00776113	0.166921	FALSE	0.0540127
DEXI	0.00505074	0.0663133	0.096968	0.247495	0.00778673	0.0889072	FALSE	0.0540127
ACTL6A	0.0046029	0.140878	0.101925	0.286309	0.00796776	0.15152	FALSE	0.0548333
MAD2L1	0.0116334	0.0762363	0.0775622	0.174176	0.00885211	0.0628494	FALSE	0.0604433
SYF2	0.00921978	0.0589388	0.0859003	0.299464	0.00893627	0.107005	FALSE	0.060545
KPNB1	0.00457947	0.0551139	0.111972	0.362323	0.00903552	0.133613	FALSE	0.0607465
UBL5	0.00279223	0.0352053	0.134698	0.385438	0.00936117	0.122272	FALSE	0.0620752
PALM2-AKAP2	0.00377741	0.141266	0.123028	0.399705	0.00942194	0.223248	FALSE	0.0620752
NUP43	0.00223434	0.0634466	0.144941	0.316656	0.00945193	0.118679	FALSE	0.0620752
THOC1	0.0273816	0.149329	0.0554847	0.148577	0.00951725	0.077172	FALSE	0.0620752
RABGEF1	0.0216184	0.248896	0.0633627	0.160026	0.00969363	0.114966	FALSE	0.0626068
KCNG2	0.00257901	0.0698362	0.141817	0.542168	0.00974201	0.256803	FALSE	0.0626068
CDCA8	0.0024425	0.0590038	0.146989	0.51092	0.0100273	0.222287	FALSE	0.0639699
RANBP2	0.00201956	0.0541749	0.156508	0.528375	0.010147	0.227209	FALSE	0.0642641
COX7C	0.0142297	0.231878	0.0809612	0.251152	0.0103759	0.171371	FALSE	0.0652413
RNGTT	0.00169334	0.0721328	0.168044	0.472801	0.0104966	0.213285	FALSE	0.0655287
RPL31	0.000648814	0.0382331	0.218295	0.475976	0.010908	0.17227	FALSE	0.0676142
KIF21B	0.012827	0.194871	0.089102	0.206191	0.0110773	0.126823	FALSE	0.068078
HSP90AB1	0.0312987	0.187036	0.0596225	0.226341	0.0111784	0.136392	FALSE	0.068078
POLR3C	0.00618636	0.109084	0.118361	0.333072	0.0112165	0.160244	FALSE	0.068078
TMED10	0.00280975	0.0660704	0.153187	0.552424	0.011318	0.259352	FALSE	0.0682205
MRPL4	0.0232554	0.204752	0.070712	0.360809	0.0114945	0.234677	FALSE	0.0688094
HMGN2	0.00885228	0.109779	0.107988	0.351905	0.0117772	0.17174	FALSE	0.0700225
PSMB5	0.00839956	0.136729	0.110751	0.410924	0.0118695	0.227652	FALSE	0.0700944
EID2	0.00805911	0.0760046	0.119158	0.43073	0.0128228	0.191348	FALSE	0.0748455
ORAI3	0.0358272	0.356032	0.0633157	0.228825	0.0129619	0.203978	FALSE	0.0748455
PCP2	0.025948	0.163512	0.0743603	0.19785	0.0129663	0.109792	FALSE	0.0748455
ELL	0.0102951	0.164659	0.110197	0.29694	0.0130166	0.170469	FALSE	0.0748455
EIF3H	0.00526964	0.0936669	0.141972	0.50338	0.0133851	0.255445	FALSE	0.0764616
ESPL1	0.00126278	0.0362923	0.217596	0.427285	0.0140222	0.143774	FALSE	0.0787996
INTS4	0.000992699	0.0224376	0.231003	0.595818	0.0141049	0.211321	FALSE	0.0787996
ACTR2	0.0165163	0.142445	0.0975129	0.324932	0.0141229	0.175874	FALSE	0.0787996
DDX49	0.00120955	0.029484	0.221633	0.388787	0.01421	0.115835	FALSE	0.0787996
NFKBIE	0.0108948	0.130764	0.115812	0.32318	0.0142756	0.167942	FALSE	0.0787996
ADAMTSL5	0.000568995	0.00780344	0.263094	0.66815	0.0143354	0.199445	FALSE	0.0787996
HSPA5	0.00107368	0.0512469	0.23072	0.544963	0.0145036	0.234001	FALSE	0.0792259
PIK3C3	0.0261752	0.413074	0.0827946	0.200695	0.0147915	0.201741	FALSE	0.0797359
RPS27A	0.000662016	0.0505888	0.259959	0.498761	0.0148342	0.203517	FALSE	0.0797359
ALG11	0.0042225	0.0520632	0.163742	0.396887	0.0148706	0.147979	FALSE	0.0797359
RADIL	0.0286983	0.335707	0.0812026	0.368082	0.0152108	0.30683	FALSE	0.0810626
RPL19	0.00149343	0.0956635	0.221366	0.510763	0.0153921	0.262552	FALSE	0.0815314
FAU	0.00219537	0.041979	0.204595	0.529177	0.0158181	0.209517	FALSE	0.083283
POLD3	0.00924182	0.0752771	0.133627	0.344751	0.0159433	0.142346	FALSE	0.0834398
PALM	0.00363452	0.087399	0.180695	0.33068	0.0161137	0.144019	FALSE	0.0835314
HDAC3	0.00477394	0.111465	0.169177	0.463053	0.0164393	0.243659	FALSE	0.0835314
HAUS3	0.00295387	0.065573	0.194225	0.392964	0.0164731	0.159705	FALSE	0.0835314
TMEM158	0.0186742	0.217433	0.105082	0.354676	0.0165091	0.237119	FALSE	0.0835314
MCM2	0.00380657	0.108513	0.181834	0.576351	0.0165844	0.324158	FALSE	0.0835314
KRT76	0.0263808	0.217476	0.0912567	0.260836	0.0166785	0.171818	FALSE	0.0835314
INTS8	0.0110515	0.192467	0.129722	0.376892	0.0166788	0.239185	FALSE	0.0835314
IPO13	0.000359955	0.0124423	0.313063	0.652824	0.0167591	0.21429	FALSE	0.0835314
NMD3	0.0308939	0.146852	0.0854359	0.18767	0.016821	0.0976602	FALSE	0.0835314
NUP133	0.00794456	0.204898	0.149867	0.593375	0.0173704	0.416224	FALSE	0.0850902
WNK1	0.0128356	0.128494	0.126888	0.500589	0.0174091	0.284259	FALSE	0.0850902
SF3B5	0.0165395	0.175575	0.115236	0.362004	0.0174269	0.219163	FALSE	0.0850902
IL4R	0.0226679	0.210941	0.103587	0.311649	0.0179324	0.203517	FALSE	0.0865912
POLR3F	0.0149244	0.158127	0.122659	0.435477	0.0179325	0.259278	FALSE	0.0865912
HTR5A	0.0363005	0.410963	0.0845141	0.281439	0.0181786	0.269896	FALSE	0.0872974
PDCD2L	0.029196	0.306368	0.0970251	0.254307	0.0189546	0.204391	FALSE	0.0898368
TULP1	0.000504315	0.0316985	0.314586	0.751026	0.019001	0.362912	FALSE	0.0898368
MAT2A	0.0367311	0.29039	0.0873629	0.243609	0.0190158	0.189861	FALSE	0.0898368
FHOD1	0.0390815	0.198683	0.0861099	0.25394	0.0193674	0.159011	FALSE	0.0910061
POLE	0.0226114	0.213284	0.112507	0.578126	0.0198205	0.408794	FALSE	0.0926369
CMAS	4.95292e-08	6.774e-05	0.768557	0.919461	0.0200585	0.237672	FALSE	0.0929416
TONSL	0.0161523	0.166755	0.130071	0.387871	0.0200984	0.231598	FALSE	0.0929416
BANF1	0.0125009	0.142245	0.148001	0.402703	0.0210483	0.225914	FALSE	0.0959724
RANGAP1	0.000347276	0.0230436	0.354481	0.575031	0.0210572	0.199824	FALSE	0.0959724
EXOC1	0.0090267	0.251925	0.165707	0.467711	0.0211306	0.342007	FALSE	0.0959724
OR7G3	0.0336403	0.178892	0.100346	0.22189	0.0213009	0.130292	FALSE	0.0959724
RIOK1	0.000882794	0.0286752	0.300778	0.503563	0.0213028	0.170915	FALSE	0.0959724
CDC23	0.00139408	0.0537534	0.2751	0.515311	0.0215076	0.218187	FALSE	0.0963982
ACIN1	0.0052405	0.0456348	0.202642	0.630721	0.0222589	0.28665	FALSE	0.0992566
RPS19BP1	0.0124802	0.220183	0.155806	0.372881	0.0225237	0.251741	FALSE	0.0999275
TAF4	0.00708465	0.175605	0.188244	0.457622	0.0227239	0.287081	FALSE	0.100306
FNBP4	0.0219529	0.392085	0.129101	0.366762	0.0231662	0.332836	FALSE	0.101745
ZP3	0.00824002	0.0856099	0.182894	0.567174	0.0232891	0.293302	FALSE	0.101773
DLG4	0.00441467	0.0805523	0.222086	0.457575	0.023793	0.212273	FALSE	0.103458
RBM25	0.00106416	0.025542	0.309934	0.54821	0.0240161	0.18972	FALSE	0.103596
PABPN1	0.0147243	0.252896	0.154529	0.287724	0.0240618	0.206353	FALSE	0.103596
INTS6	0.0124453	0.083716	0.166442	0.516845	0.0245817	0.254771	FALSE	0.105131
REXO2	0.00977932	0.237239	0.180545	0.445133	0.0246588	0.315704	FALSE	0.105131
RRM1	0.0116741	0.108392	0.176169	0.438942	0.0257955	0.224997	FALSE	0.109331
GPR17	0.00704677	0.227568	0.206427	0.431464	0.0258943	0.299561	FALSE	0.109331
RHBDL1	0.00690407	0.0971948	0.216467	0.721795	0.0275159	0.441831	FALSE	0.114553
BTF3L4	0.00812096	0.0940386	0.206584	0.564325	0.0275252	0.30021	FALSE	0.114553
FOXN4	0.0268889	0.257774	0.1369	0.678685	0.0275898	0.529056	FALSE	0.114553
SYNGR1	0.0083836	0.553167	0.205321	0.478523	0.0276552	0.508329	FALSE	0.114553
OR4M2	0.0372408	0.292424	0.120036	0.408972	0.0278203	0.317665	FALSE	0.114693
CWC22	0.0159134	0.0935643	0.168848	0.382267	0.0280522	0.177807	FALSE	0.115106
COPS5	0.0116774	0.172803	0.189361	0.487481	0.0284903	0.307615	FALSE	0.116357
PXMP2	0.0162625	0.236235	0.171472	0.36035	0.0289208	0.251112	FALSE	0.117141
EIF4G1	0.0289486	0.35429	0.138122	0.531363	0.0289502	0.45205	FALSE	0.117141
ATP6V0A1	0.02757	0.293044	0.141416	0.345023	0.0290863	0.267981	FALSE	0.11715
ECT2	0.0164063	0.197926	0.172689	0.359496	0.0293124	0.230013	FALSE	0.117518
RHOBTB3	0.0212368	0.130258	0.158425	0.580455	0.0295579	0.347554	FALSE	0.117538
SENP6	0.0312525	0.434326	0.136299	0.364245	0.0296075	0.3508	FALSE	0.117538
NOB1	0.00615976	0.0860775	0.235326	0.550449	0.0297208	0.28134	FALSE	0.117538
RPS8	0.00207397	0.058169	0.308485	0.845169	0.030241	0.534116	FALSE	0.119057
TPSD1	0.0225655	0.187123	0.158991	0.383637	0.030569	0.240851	FALSE	0.119742
NAPA	0.0148388	0.267355	0.18491	0.566957	0.0306889	0.433535	FALSE	0.119742
CCT6B	0.0281146	0.314094	0.147102	0.622231	0.0308476	0.509858	FALSE	0.119826
SNRNP200	0.0019123	0.0436457	0.321865	0.527713	0.0316098	0.211263	FALSE	0.122243
CHAF1A	0.019049	0.240292	0.174815	0.543932	0.0319195	0.397301	FALSE	0.122679
PCED1A	0.00859895	0.108863	0.22572	0.466955	0.0320493	0.244132	FALSE	0.122679
RPS4X	0.00642341	0.0594217	0.245682	0.486773	0.0322522	0.207541	FALSE	0.122679
PGAP3	0.0229085	0.309862	0.16497	0.47076	0.0322839	0.376931	FALSE	0.122679
ARGLU1	0.00953234	0.0870295	0.221229	0.670977	0.0325025	0.380912	FALSE	0.122934
SF1	0.0176681	0.321154	0.182476	0.469235	0.0326324	0.381767	FALSE	0.122934
GALP	0.0342285	0.29024	0.143321	0.608086	0.0329729	0.483353	FALSE	0.123684
TEKT4	0.00333492	0.0469198	0.297097	0.519375	0.0337827	0.211047	FALSE	0.12618
EIF2S2	0.0288139	0.262741	0.158223	0.564019	0.0342014	0.428211	FALSE	0.1272
TUBGCP6	0.00152445	0.0686447	0.355474	0.636272	0.0348535	0.326996	FALSE	0.128713
SRSF2	0.00530701	0.0735974	0.271656	0.542735	0.0349026	0.261694	FALSE	0.128713
LGALS9B	0.010104	0.076523	0.231096	0.7403	0.0354669	0.434859	FALSE	0.130244
ARHGAP28	0.0265526	0.235247	0.168706	0.46764	0.03565	0.332151	FALSE	0.130368
RFPL4B	0.0245982	0.402618	0.174838	0.425408	0.035984	0.387155	FALSE	0.131042
FKRP	0.0295372	0.178613	0.164255	0.444674	0.0362827	0.279498	FALSE	0.131581
BRD8	0.0125143	0.069228	0.221544	0.518955	0.0365484	0.240115	FALSE	0.131971
CRYBB1	0.0323048	0.289325	0.160024	0.659163	0.0366922	0.529585	FALSE	0.131971
TARBP1	0.00165327	0.0226598	0.363252	0.775158	0.0372761	0.360777	FALSE	0.133522
RPAP2	0.0213848	0.160874	0.189464	0.456733	0.0374311	0.276448	FALSE	0.13353
KRTAP10-9	0.000620065	0.0145255	0.431013	0.732355	0.0376737	0.285989	FALSE	0.133849
NOLC1	0.0256864	0.229837	0.179484	0.585739	0.0379874	0.426328	FALSE	0.134417
FAM89B	0.0357459	0.390183	0.158932	0.350835	0.0382538	0.318676	FALSE	0.134708
TAF1C	0.0127624	0.181523	0.228533	0.526477	0.0385077	0.344123	FALSE	0.134708
PPP1R14B	0.00176489	0.0741469	0.36542	0.619631	0.0385319	0.320656	FALSE	0.134708
URB1	0.0129334	0.126099	0.229135	0.532536	0.0388701	0.306149	FALSE	0.135348
DISP2	0.0391398	0.362066	0.155732	0.397528	0.0390483	0.343743	FALSE	0.135429
RTKN	0.00248941	0.0733172	0.348774	0.773156	0.0399238	0.466228	FALSE	0.136588
TMEM242	0.0312835	0.17475	0.173493	0.31775	0.0399654	0.189148	FALSE	0.136588
SH3BP5	0.0035819	0.124475	0.32377	0.640668	0.0400042	0.393516	FALSE	0.136588
HIST1H2AC	0.0347236	0.257011	0.166726	0.37637	0.0400073	0.273893	FALSE	0.136588
RIC1	0.0133064	0.150888	0.233782	0.458596	0.0404743	0.27079	FALSE	0.137321
YARS2	0.00896515	0.152619	0.26183	0.934497	0.040566	0.784429	FALSE	0.137321
FBXO33	0.0221419	0.156528	0.199516	0.523873	0.0407169	0.323862	FALSE	0.137321
EIF3I	0.00129554	0.0676521	0.399611	0.737121	0.0410605	0.418765	FALSE	0.137321
TXNL4A	0.00307318	0.0321145	0.339839	0.830539	0.0411074	0.457323	FALSE	0.137321
APOC1	0.0281609	0.290548	0.185005	0.430266	0.0412441	0.333623	FALSE	0.137321
PLEKHJ1	0.00705879	0.094894	0.282669	0.566484	0.0414675	0.302754	FALSE	0.137321
POLR2H	0.0292491	0.338808	0.183513	0.34709	0.0415565	0.291449	FALSE	0.137321
DDOST	0.0384076	0.480621	0.165395	0.461471	0.0416362	0.456984	FALSE	0.137321
SLC1A6	0.0117622	0.112763	0.248271	0.691377	0.0418979	0.428787	FALSE	0.137665
CCIN	0.023604	0.280421	0.202024	0.450132	0.0426152	0.34404	FALSE	0.139497
SKIV2L2	0.00580447	0.0502707	0.307492	0.579769	0.0439269	0.25651	FALSE	0.142768
DDX54	0.0191077	0.134942	0.221762	0.502485	0.0439413	0.290851	FALSE	0.142768
IL18BP	0.0288172	0.330323	0.195459	0.396254	0.0447441	0.326889	FALSE	0.144838
RPS9	0.0344207	0.202894	0.185626	0.429461	0.0455609	0.283443	FALSE	0.146938
PFN1	0.0211149	0.246306	0.222884	0.694548	0.0462258	0.53722	FALSE	0.147845
SRP72	0.0200149	0.5162	0.226852	0.590477	0.0462492	0.586304	FALSE	0.147845
COL5A2	0.00478119	0.0642999	0.332121	0.688821	0.0463494	0.366609	FALSE	0.147845
B3GAT3	0.0213254	0.238202	0.225489	0.586424	0.0471631	0.432326	FALSE	0.149893
SALL3	0.0191566	0.125325	0.236531	0.536612	0.0480515	0.308599	FALSE	0.151747
TMED9	0.00415393	0.120281	0.349926	0.64088	0.0480938	0.389699	FALSE	0.151747
ARCN1	0.013694	0.104666	0.264872	0.749485	0.0489744	0.479318	FALSE	0.15397
CROCC	0.0215014	0.23457	0.232828	0.41963	0.049435	0.29455	FALSE	0.154861
DKK2	0.0205266	0.304394	0.238381	0.571695	0.0500354	0.459378	FALSE	0.155304
TPM4	0.00321357	0.190659	0.377468	0.809493	0.0501358	0.623672	FALSE	0.155304
EIF3F	0.0126518	0.100152	0.275277	0.72031	0.0501675	0.443712	FALSE	0.155304
OBSL1	0.023701	0.109423	0.229311	0.453873	0.0505372	0.235756	FALSE	0.155304
SMR3B	0.020645	0.177497	0.240156	0.408831	0.0506727	0.252882	FALSE	0.155304
XKR8	0.0245478	0.304501	0.227508	0.511511	0.0507852	0.407894	FALSE	0.155304
C16orf72	0.0236456	0.141505	0.230441	0.527421	0.0508203	0.314947	FALSE	0.155304
TMEM140	0.00494428	0.0940506	0.352328	0.574463	0.0517643	0.308018	FALSE	0.157212
SAP30BP	5.42975e-05	0.0027336	0.646458	0.908312	0.0518745	0.400624	FALSE	0.157212
HNRNPK	0.0244161	0.269817	0.231911	0.561909	0.0519843	0.430661	FALSE	0.157212
EIF3G	0.00136542	0.051655	0.450365	0.724562	0.0527754	0.379714	FALSE	0.159054
COQ2	0.0194783	0.260855	0.253286	0.570805	0.0532043	0.432918	FALSE	0.159796
RBM10	0.00113599	0.0170464	0.466016	0.849519	0.053426	0.430512	FALSE	0.159912
SPC24	0.0108272	0.349904	0.300104	0.823553	0.0536546	0.728364	FALSE	0.160048
ZNF710	0.0355367	0.315031	0.210105	0.619205	0.054119	0.507649	FALSE	0.160091
NOA1	0.00731043	0.12994	0.33231	0.690459	0.0541985	0.44484	FALSE	0.160091
SYT2	0.0133054	0.19631	0.28634	0.522063	0.0542438	0.350775	FALSE	0.160091
SLC6A4	0.0231735	0.481472	0.243908	0.56673	0.0544016	0.548435	FALSE	0.160091
SOBP	0.00643608	0.130444	0.345818	0.644996	0.0551795	0.402947	FALSE	0.161835
LRCH3	0.0256248	0.17894	0.240541	0.607036	0.0557703	0.409436	FALSE	0.163021
ERAL1	0.0266553	0.173237	0.240173	0.440234	0.0566238	0.272746	FALSE	0.164964
TREML4	0.0286142	0.411828	0.235304	0.449235	0.0568461	0.411944	FALSE	0.165062
SHC4	0.0151537	0.126116	0.286133	0.452579	0.0570793	0.248202	FALSE	0.165119
ST13	0.0217702	0.224281	0.258103	0.585558	0.0572439	0.422531	FALSE	0.165119
RPSA	0.00277386	0.0861476	0.420512	0.826307	0.0580315	0.549087	FALSE	0.166841
RBM28	0.0114305	0.085606	0.317458	0.626976	0.0596821	0.340828	FALSE	0.171024
SLC45A1	0.0292447	0.389505	0.243636	0.745085	0.0601133	0.665572	FALSE	0.17155
SNAPC1	0.00173163	0.0850706	0.463685	0.81832	0.0602584	0.537199	FALSE	0.17155
RPS11	0.0225449	0.245835	0.266351	0.608007	0.0606817	0.456218	FALSE	0.171642
TSG101	0.000362729	0.00912836	0.571204	0.854351	0.0606834	0.390228	FALSE	0.171642
NAGLU	0.0138623	0.202714	0.308419	0.585219	0.0615516	0.407663	FALSE	0.173536
RAN	0.000695804	0.0776714	0.533935	0.759182	0.0620222	0.456717	FALSE	0.1743
GSPT1	0.0319109	0.125271	0.24498	0.730597	0.0629257	0.480643	FALSE	0.175182
HIST2H3D	0.000181889	0.00272996	0.621794	0.834458	0.0630631	0.287211	FALSE	0.175182
FGF2	0.0214915	0.172911	0.278045	0.574949	0.063161	0.377484	FALSE	0.175182
EIF2S1	0.0364889	0.605875	0.235475	0.460392	0.0634326	0.519753	FALSE	0.175182
XXYLT1	0.0246481	0.275584	0.267983	0.656401	0.0635376	0.518838	FALSE	0.175182
ZNF536	0.0214	0.205412	0.279576	0.529643	0.0635386	0.363006	FALSE	0.175182
XPNPEP3	0.0190675	0.229881	0.290387	0.514438	0.0639672	0.366382	FALSE	0.175809
MYADM	0.0276929	0.343661	0.260365	0.558951	0.0641859	0.470168	FALSE	0.175857
HCN3	0.00310436	0.0710811	0.436248	0.809942	0.0644667	0.507152	FALSE	0.176075
MTHFD2L	0.0104066	0.0714854	0.3438	0.65599	0.0651892	0.347616	FALSE	0.177493
RASGRP3	0.00428201	0.265056	0.415611	0.674452	0.0655789	0.529499	FALSE	0.178
RPL24	0.00889672	0.281371	0.360526	0.641428	0.0663927	0.508399	FALSE	0.179651
RNPS1	0.00893894	0.117946	0.361401	0.65232	0.0667673	0.397648	FALSE	0.180104
RPL37	0.00803077	0.16243	0.370739	0.636173	0.0669722	0.422448	FALSE	0.180104
PIGX	0.00773951	0.0790866	0.375527	0.663708	0.0675106	0.364459	FALSE	0.180658
VPS37C	0.00212101	0.0281424	0.477172	0.785857	0.0679551	0.390384	FALSE	0.180658
MRPL51	0.00234033	0.0767496	0.470439	0.738876	0.0681127	0.433682	FALSE	0.180658
FGFR3	0.0320827	0.182645	0.259657	0.600324	0.0681435	0.406352	FALSE	0.180658
FAM159A	0.0275063	0.664787	0.27284	0.70424	0.068212	0.751114	FALSE	0.180658
ECI1	0.0198619	0.163093	0.301992	0.641918	0.0687932	0.428174	FALSE	0.181647
SNAP29	0.0231436	0.25513	0.29185	0.660129	0.0697094	0.509788	FALSE	0.183512
AURKB	0.032102	0.256919	0.266378	0.407748	0.0705321	0.29782	FALSE	0.18512
IDI2	0.00384738	0.124415	0.441848	0.686403	0.0707714	0.435657	FALSE	0.185154
WASL	0.0129534	0.13969	0.344555	0.76847	0.0709686	0.535197	FALSE	0.185154
RPA2	0.0183594	0.511736	0.316033	0.647169	0.0712308	0.633449	FALSE	0.185285
SF3B3	0.0278026	0.194896	0.283594	0.545553	0.0722532	0.368899	FALSE	0.187387
SOD1	0.0322042	0.225894	0.271936	0.569412	0.0726159	0.40969	FALSE	0.18777
SLC2A6	0.0207818	0.536909	0.312188	0.592797	0.0734843	0.598489	FALSE	0.188255
PSMA2	0.0384403	0.181104	0.26044	0.47146	0.0740381	0.301104	FALSE	0.188255
TOPBP1	0.00215226	0.0462745	0.498225	0.7583	0.0744744	0.404065	FALSE	0.188255
SNRPD2	0.00121577	0.056516	0.540533	0.73957	0.0748409	0.403407	FALSE	0.188255
RPL29	0.00341242	0.0289096	0.464998	0.733155	0.0749591	0.337615	FALSE	0.188255
RPL32	0.00280503	0.059192	0.480127	0.805375	0.0750053	0.482536	FALSE	0.188255
TIMM10	0.0257592	0.378669	0.2989	0.54853	0.0753136	0.479875	FALSE	0.188255
IGDCC4	0.00918585	0.137349	0.386815	0.714068	0.075319	0.475073	FALSE	0.188255
FUT2	0.00714877	0.085954	0.407673	0.811689	0.0753904	0.529803	FALSE	0.188255
SP5	0.0182918	0.380106	0.32994	0.645742	0.0757883	0.567093	FALSE	0.188255
GOPC	0.0296894	0.366835	0.288397	0.619923	0.0759964	0.536687	FALSE	0.188255
KRTCAP2	0.0020623	0.0982004	0.506352	0.737499	0.0760024	0.459222	FALSE	0.188255
GNL3L	0.0190358	0.268848	0.327502	0.780509	0.0761304	0.639686	FALSE	0.188255
CENPF	0.0140337	0.103866	0.354247	0.695947	0.076324	0.423734	FALSE	0.188255
RACGAP1	0.00862889	0.136584	0.395954	0.672343	0.0765895	0.433693	FALSE	0.188255
NDUFV1	0.031108	0.236693	0.286649	0.846646	0.0768541	0.6989	FALSE	0.188255
CHAF1B	0.0109137	0.394029	0.377832	0.688359	0.0770775	0.61358	FALSE	0.188255
FXN	0.035311	0.222156	0.276721	0.539113	0.0773263	0.38176	FALSE	0.188255
RPS24	0.00315401	0.108294	0.479452	0.87725	0.0775729	0.648006	FALSE	0.188255
TNFAIP3	1.16168e-06	0.00014793	0.866795	0.954589	0.0775848	0.35786	FALSE	0.188255
ANKFY1	0.0121966	0.145928	0.36999	0.614811	0.0775906	0.389979	FALSE	0.188255
RNF41	0.0298482	0.222516	0.292543	0.523344	0.0776744	0.369003	FALSE	0.188255
WDR43	0.00352453	0.0483475	0.471481	0.81839	0.0777573	0.479156	FALSE	0.188255
SEC14L6	0.0191161	0.628311	0.332973	0.698203	0.0781424	0.730219	FALSE	0.188664
COX8C	0.033599	0.32025	0.283906	0.6011	0.0783607	0.494333	FALSE	0.18867
NSL1	0.00276588	0.0804782	0.492635	0.879651	0.0785771	0.620355	FALSE	0.188671
LGI1	0.0163084	0.562288	0.348729	0.629345	0.0788206	0.64212	FALSE	0.188738
NUP188	0.0204396	0.18191	0.332604	0.557363	0.0800646	0.369474	FALSE	0.190936
OSBP	0.0187265	0.26107	0.340599	0.673478	0.0801758	0.526118	FALSE	0.190936
RGPD2	0.000944962	0.0184528	0.575714	0.920187	0.0805166	0.564492	FALSE	0.191227
KCNB2	0.0266346	0.289184	0.311923	0.680543	0.0810616	0.54974	FALSE	0.192
TAF7	0.0138774	0.204632	0.370741	0.84955	0.0815883	0.683443	FALSE	0.192725
FBXL19	0.0235534	0.268122	0.325692	0.732517	0.082085	0.588611	FALSE	0.19301
FIP1L1	0.0201508	0.158407	0.339725	0.719211	0.0821507	0.498651	FALSE	0.19301
EIF3E	0.0318169	0.184862	0.301235	0.555283	0.0830362	0.369873	FALSE	0.194567
PDE3B	0.029445	0.350414	0.309691	0.620481	0.0835812	0.528379	FALSE	0.194766
RRP1	0.00136383	0.0548086	0.559927	0.906368	0.0836768	0.630126	FALSE	0.194766
MS4A10	0.0356374	0.37333	0.292894	0.571124	0.0837897	0.496773	FALSE	0.194766
SAMD4A	0.0215602	0.154548	0.340674	0.90266	0.0846673	0.728123	FALSE	0.196059
PPP1R2	0.00156857	0.0319929	0.553771	0.823836	0.0849403	0.448017	FALSE	0.196059
BEND3	0.00605162	0.12751	0.450758	0.93083	0.0850436	0.759898	FALSE	0.196059
RPS6	0.0185225	0.125326	0.356003	0.884653	0.0853177	0.675766	FALSE	0.196059
AFAP1L2	0.0272181	0.325753	0.321948	0.709271	0.0855114	0.598064	FALSE	0.196059
HIST1H1A	0.0140106	0.311707	0.381644	0.870837	0.0856917	0.76688	FALSE	0.196059
RPL8	0.0251242	0.19886	0.33059	0.708734	0.0860303	0.519271	FALSE	0.19632
VPS13A	0.019286	0.220763	0.355781	0.644079	0.0865454	0.472482	FALSE	0.196966
CBX7	0.0156834	0.241195	0.374746	0.636251	0.0867643	0.478768	FALSE	0.196966
PPWD1	0.0340739	0.306883	0.305912	0.658176	0.0872483	0.538813	FALSE	0.197552
TMEM147	0.0261877	0.392737	0.332038	0.666219	0.0879978	0.592382	FALSE	0.198734
EDA	0.0379695	0.167567	0.29906	0.535651	0.0885068	0.341391	FALSE	0.198879
NCBP1	0.0188956	0.355917	0.362979	0.69565	0.0885173	0.60097	FALSE	0.198879
RPL23A	0.0252206	0.285951	0.339824	0.679933	0.0896518	0.547263	FALSE	0.200461
SMARCE1	0.0205434	0.168063	0.358857	0.600638	0.0897858	0.395608	FALSE	0.200461
RSRC2	0.0140777	0.150188	0.392955	0.847823	0.0899092	0.642403	FALSE	0.200461
EPN3	0.0100325	0.192549	0.423845	0.87065	0.0904221	0.70454	FALSE	0.200853
SPC25	0.0104201	0.164168	0.420927	0.672899	0.0905449	0.457795	FALSE	0.200853
GZMA	0.0147558	0.293698	0.392978	0.67583	0.0914431	0.54787	FALSE	0.202332
RPL34	0.000724035	0.0391967	0.625919	0.904234	0.0920064	0.595031	FALSE	0.203065
CAPN1	0.00241311	0.133339	0.543778	0.845104	0.0924138	0.624416	FALSE	0.203196
PDZD8	0.015932	0.155278	0.389077	0.747567	0.0925308	0.525763	FALSE	0.203196
RABAC1	0.0186778	0.361083	0.378842	0.600773	0.0940742	0.516451	FALSE	0.206067
PHGR1	0.0355378	0.275683	0.320232	0.697073	0.0945256	0.557749	FALSE	0.206266
PSMA5	0.00280236	0.0498974	0.54017	0.715097	0.0951808	0.367306	FALSE	0.206266
CTBP2	0.0104246	0.249061	0.43422	0.771023	0.0954258	0.617691	FALSE	0.206266
RPL27A	0.00710887	0.103478	0.467118	0.744267	0.0955427	0.472388	FALSE	0.206266
PHYH	0.0353558	0.326016	0.323245	0.638479	0.0955541	0.531363	FALSE	0.206266
BARD1	0.0327519	0.185692	0.330573	0.732697	0.095581	0.534109	FALSE	0.206266
GJA9	0.0314506	0.205388	0.336411	0.613175	0.0963893	0.433948	FALSE	0.207023
ICE1	0.0282196	0.219013	0.346681	0.83938	0.0964053	0.67925	FALSE	0.207023
CPSF2	0.00615394	0.154303	0.483435	0.781762	0.0971544	0.56304	FALSE	0.208117
SF3A1	0.00295334	0.0448451	0.542151	0.873741	0.0973914	0.552729	FALSE	0.208117
CES2	0.0230532	0.196924	0.370599	0.761795	0.0983917	0.573409	FALSE	0.20929
E2F6	0.0203826	0.304483	0.382084	0.761114	0.0984207	0.638759	FALSE	0.20929
CDH26	0.0196543	0.291677	0.386257	0.757551	0.0987428	0.628028	FALSE	0.20929
IP6K3	0.0381569	0.258218	0.32403	0.605075	0.0988981	0.461368	FALSE	0.20929
IRF7	0.0222921	0.272063	0.375639	0.735162	0.0991513	0.593649	FALSE	0.209319
BCKDHA	0.0257054	0.30257	0.363854	0.679852	0.0997722	0.556804	FALSE	0.210123
SKA3	0.0159081	0.326676	0.409185	0.6673	0.100157	0.558452	FALSE	0.210427
CHCHD7	0.0261244	0.216076	0.364586	0.687328	0.100685	0.510229	FALSE	0.211014
TMOD4	0.0147955	0.0971059	0.417688	0.616911	0.10092	0.345416	FALSE	0.211014
KIAA1024	0.0368996	0.257172	0.334971	0.741561	0.102132	0.591335	FALSE	0.211979
PPP2R1A	0.0271082	0.1379	0.364666	0.680498	0.102145	0.44261	FALSE	0.211979
EEF1A1	0.0111126	0.126442	0.4468	0.626256	0.102342	0.382687	FALSE	0.211979
NACA	0.0329759	0.221343	0.346388	0.664145	0.102352	0.491603	FALSE	0.211979
CMTM4	0.00726728	0.111748	0.485666	0.868048	0.103268	0.637237	FALSE	0.213373
DMRT2	0.0054596	0.135153	0.510363	0.843259	0.103682	0.623492	FALSE	0.213721
COX10	0.0352603	0.435504	0.344362	0.760266	0.104234	0.701539	FALSE	0.214354
ZNF445	0.0213686	0.329226	0.393713	0.598189	0.104833	0.496756	FALSE	0.21508
RBMXL1	0.0166023	0.0814536	0.417875	0.745148	0.105147	0.446643	FALSE	0.215218
PLA2G12B	0.0228325	0.256607	0.389156	0.910431	0.105519	0.796875	FALSE	0.215475
USP24	0.0269732	0.122953	0.374432	0.67508	0.105985	0.423492	FALSE	0.215703
PROCA1	0.0212571	0.276771	0.397359	0.837591	0.106124	0.709386	FALSE	0.215703
PRPF8	0.00710095	0.108463	0.496399	0.775642	0.106729	0.512639	FALSE	0.21643
KLHL18	0.0123645	0.258126	0.452004	0.733738	0.108164	0.583844	FALSE	0.218833
IGF2	0.0264012	0.342939	0.384275	0.651756	0.109255	0.552879	FALSE	0.220528
RFC2	0.00391335	0.0646019	0.552993	0.876083	0.110137	0.592128	FALSE	0.221211
ONECUT3	0.0341626	0.285115	0.361691	0.81617	0.110341	0.688553	FALSE	0.221211
MED8	0.00831052	0.141561	0.492255	0.757648	0.110424	0.524833	FALSE	0.221211
IMPDH1	0.00636913	0.117606	0.516274	0.866158	0.111103	0.640103	FALSE	0.221211
UTP18	0.00274387	0.0395957	0.583093	0.885494	0.111445	0.561111	FALSE	0.221211
SAMD4B	0.015025	0.0812026	0.44249	0.657189	0.111476	0.36138	FALSE	0.221211
AKIRIN1	0.00679877	0.0912103	0.512166	0.707062	0.111642	0.42006	FALSE	0.221211
FOXH1	0.0159917	0.156943	0.437863	0.800564	0.111928	0.587375	FALSE	0.221211
COPB2	0.00239211	0.0455149	0.594498	0.825761	0.112012	0.483089	FALSE	0.221211
AHCTF1	0.00448834	0.111278	0.547053	0.911978	0.112124	0.710038	FALSE	0.221211
NOP9	0.0169692	0.207727	0.436188	0.781941	0.113523	0.603326	FALSE	0.223467
CCT5	0.0369982	0.193995	0.362172	0.829435	0.114035	0.650563	FALSE	0.223467
SNAPC4	0.00306178	0.0959898	0.581046	0.946032	0.114035	0.767439	FALSE	0.223467
RPL7A	0.0227292	0.224421	0.41209	0.905894	0.114986	0.774741	FALSE	0.224828
DEPDC1	0.0268547	0.246648	0.396861	0.628503	0.115367	0.475186	FALSE	0.225069
TPPP	0.012888	0.0824336	0.468736	0.701376	0.116658	0.403631	FALSE	0.227081
NUP160	0.00599382	0.0542706	0.535457	0.742902	0.117041	0.402932	FALSE	0.22732
RPS19	0.00685284	0.211896	0.525629	0.784311	0.117567	0.608815	FALSE	0.227835
FOXD4	0.000500839	0.0187429	0.709764	0.873702	0.118705	0.475717	FALSE	0.229069
IDH3B	0.0193589	0.152743	0.436003	0.846112	0.118728	0.642117	FALSE	0.229069
SIRT2	0.0149837	0.236711	0.461592	0.800995	0.119476	0.643725	FALSE	0.230004
EIF3B	0.0318873	0.296254	0.390193	0.665562	0.119914	0.539634	FALSE	0.23034
OR1E2	0.0212532	0.181948	0.431191	0.785253	0.120509	0.58882	FALSE	0.230975
RPS26	0.0355485	0.22392	0.3824	0.803917	0.121332	0.639189	FALSE	0.232045
SLC52A3	0.0054747	0.0796195	0.554784	0.767671	0.122246	0.468816	FALSE	0.233282
IER3	0.00410456	0.072063	0.578354	0.792659	0.122616	0.48724	FALSE	0.233477
PRPF6	0.0254672	0.186184	0.420814	0.703214	0.12369	0.504435	FALSE	0.234914
SHARPIN	0.0156683	0.113404	0.46757	0.670194	0.123908	0.409435	FALSE	0.234914
AQP2	0.00571122	0.172491	0.557411	0.813161	0.124944	0.614905	FALSE	0.236366
MPV17L2	0.0341917	0.145619	0.395496	0.621926	0.125539	0.395915	FALSE	0.236703
CCDC94	0.0310373	0.148401	0.405623	0.678181	0.125705	0.449666	FALSE	0.236703
MCM7	0.0193962	0.162317	0.45208	0.675646	0.125935	0.458905	FALSE	0.236703
LNX1	0.00729214	0.0681014	0.541871	0.815267	0.127001	0.509486	FALSE	0.237059
MEN1	0.038915	0.397523	0.385521	0.647284	0.127059	0.577487	FALSE	0.237059
DHX37	0.0147448	0.14232	0.480491	0.806868	0.127186	0.582689	FALSE	0.237059
SLC43A2	0.0165935	0.0989575	0.469792	0.79745	0.127295	0.52784	FALSE	0.237059
HGS	0.0258671	0.360505	0.427609	0.661822	0.12748	0.571601	FALSE	0.237059
DEFB132	0.0315791	0.246718	0.410427	0.652051	0.128739	0.496911	FALSE	0.238387
SLC25A33	0.0259037	0.145455	0.430204	0.811997	0.12874	0.591748	FALSE	0.238387
COPB1	0.00260569	0.0597441	0.626464	0.83865	0.129236	0.527528	FALSE	0.2388
ZKSCAN5	0.0232476	0.232317	0.442882	0.659358	0.129695	0.494419	FALSE	0.239033
CHMP5	0.0013854	0.0325489	0.670768	0.897787	0.129909	0.565895	FALSE	0.239033
BCL2L1	5.35545e-05	0.00424309	0.832207	0.941505	0.131021	0.510634	FALSE	0.240127
UBE2M	0.0263618	0.345029	0.43403	0.836715	0.131324	0.740916	FALSE	0.240127
CDC20	0.0168537	0.108157	0.477157	0.813725	0.131328	0.55832	FALSE	0.240127
PTX3	0.00848248	0.138544	0.541644	0.9254	0.132766	0.757297	FALSE	0.24225
TTC34	0.0279291	0.201361	0.435301	0.748454	0.134635	0.562144	FALSE	0.245149
EXOSC6	0.0184218	0.186833	0.476984	0.819317	0.135159	0.632968	FALSE	0.245264
CLINT1	0.00897773	0.113553	0.542098	0.826106	0.13526	0.579981	FALSE	0.245264
PMAIP1	0.0166047	0.488835	0.488932	0.696807	0.13618	0.66671	FALSE	0.246135
NUP107	0.00740697	0.245597	0.561172	0.814118	0.136605	0.66431	FALSE	0.246135
NDEL1	0.0263968	0.185263	0.445309	0.650883	0.136722	0.453561	FALSE	0.246135
TANC1	0.0366169	0.36397	0.412367	0.665899	0.136883	0.577211	FALSE	0.246135
ZNHIT2	0.00103572	0.0456664	0.703449	0.854648	0.137566	0.524396	FALSE	0.246135
ANXA13	0.0225424	0.18852	0.462657	0.700246	0.137577	0.503233	FALSE	0.246135
IMP3	0.00460123	0.0538349	0.60164	0.850625	0.137712	0.534374	FALSE	0.246135
AFTPH	0.0193576	0.32819	0.478927	0.673243	0.138322	0.564873	FALSE	0.246456
ST8SIA5	0.0239743	0.201423	0.458453	0.94222	0.138455	0.825686	FALSE	0.246456
TPPP3	0.0015661	0.0903641	0.680268	0.797935	0.138952	0.51819	FALSE	0.246591
RPS27	0.00225753	0.313539	0.65624	0.996412	0.139096	0.981092	FALSE	0.246591
CACTIN	0.0269052	0.399371	0.449996	0.751486	0.139898	0.676516	FALSE	0.24703
SS18L2	0.0204384	0.379167	0.477013	0.769302	0.139908	0.684728	FALSE	0.24703
SLC9A5	0.0288678	0.364428	0.445	0.776832	0.140913	0.685412	FALSE	0.248302
NCL	0.0113561	0.274555	0.534203	0.859161	0.141295	0.734887	FALSE	0.248474
ZNF80	0.00616208	0.0853983	0.586472	0.83591	0.141601	0.56114	FALSE	0.248512
TACC2	0.0383198	0.257775	0.419494	0.645736	0.142728	0.49801	FALSE	0.248522
CCDC181	0.0181224	0.123979	0.494344	0.92335	0.14274	0.742378	FALSE	0.248522
PLAGL2	0.0265974	0.153603	0.4571	0.817271	0.142805	0.605167	FALSE	0.248522
PRMT5	0.0120689	0.14217	0.532104	0.791885	0.142912	0.564465	FALSE	0.248522
TAF8	0.0237394	0.233479	0.46884	0.755036	0.143028	0.590753	FALSE	0.248522
KLK11	0.0234797	0.146603	0.471678	0.787235	0.14389	0.562857	FALSE	0.249523
MCM3	0.0377714	0.445028	0.424293	0.802675	0.144369	0.747106	FALSE	0.249859
ABCB10	0.0267368	0.206933	0.461897	0.770323	0.145433	0.589792	FALSE	0.251203
POP1	0.0196071	0.26992	0.493088	0.764543	0.145815	0.62307	FALSE	0.251365
BCAP31	0.0390909	0.400065	0.424461	0.71743	0.146274	0.643979	FALSE	0.251661
C11orf65	0.00428659	0.0567308	0.625334	0.96405	0.147004	0.775243	FALSE	0.252201
PRKAB1	0.0132362	0.289846	0.532403	0.763919	0.147165	0.633697	FALSE	0.252201
SPTLC1	0.0375069	0.287132	0.432313	0.732632	0.148042	0.599817	FALSE	0.253206
KLF9	0.0321434	0.166258	0.451543	0.701357	0.149638	0.487101	FALSE	0.255437
SNAPC2	0.0201389	0.21339	0.50055	0.810425	0.150841	0.640136	FALSE	0.256533
RUVBL2	0.0196843	0.41538	0.502797	0.918114	0.150868	0.863198	FALSE	0.256533
CENPW	0.000554015	0.0153372	0.763012	0.899072	0.152431	0.504992	FALSE	0.258233
GPC2	0.00906162	0.130548	0.57598	0.754114	0.152458	0.510815	FALSE	0.258233
LRPPRC	0.000368402	0.0218751	0.785296	0.937238	0.153994	0.620331	FALSE	0.26033
ZNF695	0.0235226	0.363583	0.49239	0.69619	0.154404	0.605467	FALSE	0.260519
ILK	0.0239116	0.218707	0.493232	0.809452	0.155674	0.642397	FALSE	0.262156
TMEM143	0.0317359	0.246758	0.466377	0.79658	0.15659	0.644717	FALSE	0.263192
LIN7B	0.0143329	0.268495	0.54516	0.738904	0.157398	0.59538	FALSE	0.264042
TRIM41	0.0154691	0.159268	0.541165	0.914448	0.158972	0.751452	FALSE	0.265711
ABCB7	0.0181401	0.120943	0.526347	0.90112	0.159001	0.699248	FALSE	0.265711
MRPL28	0.0306172	0.451601	0.476414	0.801025	0.159913	0.748147	FALSE	0.266014
SNRPD3	0.00551271	0.0687834	0.630126	0.781546	0.15994	0.469198	FALSE	0.266014
ATAD3A	0.038233	0.264724	0.453509	0.840973	0.160096	0.707197	FALSE	0.266014
CLEC11A	0.0171693	0.239324	0.534989	0.888382	0.16083	0.756357	FALSE	0.266728
GRIN3A	0.00402923	0.0462303	0.656931	0.92895	0.161844	0.662558	FALSE	0.267825
PRPF31	0.000644766	0.0397175	0.769544	0.890773	0.162105	0.570819	FALSE	0.267825
SRD5A3	0.0135417	0.209858	0.56168	0.885906	0.163457	0.736906	FALSE	0.269128
TIAL1	0.00450906	0.0713401	0.651589	0.800257	0.163509	0.495429	FALSE	0.269128
RAB4A	0.025665	0.215859	0.502122	0.843204	0.164059	0.682193	FALSE	0.269472
LRRC37B	0.0131603	0.161156	0.56586	0.900783	0.164335	0.729601	FALSE	0.269472
NDOR1	0.0256206	0.143852	0.506073	0.782621	0.166089	0.555077	FALSE	0.271839
NOP14	0.0130339	0.247567	0.570752	0.859784	0.166537	0.721796	FALSE	0.272063
ACAP1	0.0301789	0.21167	0.493132	0.817168	0.168073	0.647122	FALSE	0.274059
PTPRC	0.00314371	0.129341	0.685495	0.843197	0.168424	0.618199	FALSE	0.27412
COPS6	0.00207082	0.0421056	0.71462	0.92112	0.169542	0.636588	FALSE	0.275226
DDX51	0.0305025	0.242081	0.495079	0.820879	0.169733	0.670272	FALSE	0.275226
CAPN5	0.0297028	0.584108	0.498569	0.693444	0.17015	0.706697	FALSE	0.27539
TCP1	0.0125882	0.120533	0.582073	0.807402	0.171115	0.563105	FALSE	0.27644
FAM57B	0.00686466	0.243616	0.633276	0.859131	0.171475	0.718817	FALSE	0.276512
RPL35	0.0220494	0.172577	0.53162	0.881455	0.171953	0.707144	FALSE	0.276771
MFSD6L	0.0263183	0.537832	0.51484	0.839962	0.17235	0.81768	FALSE	0.276901
LZTS3	0.00358286	0.0440127	0.684246	0.979848	0.173203	0.818805	FALSE	0.27776
AHCY	0.0182706	0.250801	0.553323	0.774314	0.17402	0.622329	FALSE	0.27856
EEF1A2	0.0164072	0.120345	0.566377	0.814528	0.175734	0.571866	FALSE	0.280333
NUP205	0.00957694	0.441658	0.613653	0.873206	0.175769	0.819103	FALSE	0.280333
KIN	0.034757	0.501607	0.493298	0.817403	0.17628	0.783488	FALSE	0.280635
THAP1	0.0118626	0.0862874	0.597721	0.949062	0.177084	0.765774	FALSE	0.28084
KRR1	0.0299094	0.177262	0.510706	0.847963	0.177286	0.663032	FALSE	0.28084
NOL7	0.0103108	0.127193	0.610205	0.91145	0.177373	0.722733	FALSE	0.28084
CBR3	0.0211964	0.15624	0.545851	0.744556	0.177785	0.523338	FALSE	0.280985
DLG5	0.00398736	0.0400986	0.685571	0.89199	0.178718	0.573908	FALSE	0.281949
LRP1B	0.00392938	0.19965	0.687807	0.903139	0.179492	0.757227	FALSE	0.282317
OTOF	0.0358102	0.200365	0.496027	0.850728	0.179598	0.682282	FALSE	0.282317
MCIDAS	0.0348809	0.257831	0.502886	0.733328	0.181922	0.583244	FALSE	0.28537
KRTAP10-8	0.024414	0.161244	0.539926	0.899186	0.182279	0.727055	FALSE	0.28537
PCNA	0.0248298	0.197593	0.539181	0.828079	0.182812	0.651288	FALSE	0.28537
KRT85	0.0106204	0.110983	0.616949	0.906036	0.182846	0.698943	FALSE	0.28537
SLC44A3	0.0273126	0.189528	0.533985	0.774532	0.185312	0.582202	FALSE	0.288703
SUCNR1	0.0208251	0.212535	0.564024	0.873966	0.187317	0.72138	FALSE	0.291308
EIF2S3	0.00606363	0.323278	0.669773	0.905094	0.187987	0.816231	FALSE	0.291831
KANSL2	0.0341001	0.428479	0.517028	0.784686	0.188727	0.722317	FALSE	0.292218
CNDP1	0.0215357	0.188208	0.563495	0.73316	0.188905	0.536469	FALSE	0.292218
OMP	0.0337128	0.652048	0.519915	0.873517	0.189718	0.881854	FALSE	0.292877
HIVEP1	0.015453	0.0820908	0.596309	0.863288	0.190075	0.596551	FALSE	0.292877
MT1E	0.0232066	0.247128	0.559233	0.820213	0.190666	0.672408	FALSE	0.292877
ZNHIT1	0.0154011	0.0997542	0.597765	0.840129	0.190774	0.584113	FALSE	0.292877
SLC5A1	0.0311167	0.205163	0.531014	0.903695	0.191356	0.76117	FALSE	0.292877
RAC2	0.0315583	0.324722	0.529808	0.778918	0.191502	0.668054	FALSE	0.292877
TMEM86B	0.00955256	0.10348	0.640105	0.867773	0.191677	0.628336	FALSE	0.292877
MED21	0.0173698	0.177463	0.592958	0.791625	0.194498	0.592854	FALSE	0.2966
PMPCA	0.0163862	0.18656	0.598747	0.879685	0.194792	0.713728	FALSE	0.2966
PRRC2A	0.0259702	0.251031	0.558865	0.775945	0.197092	0.624251	FALSE	0.299391
SLCO5A1	0.0307513	0.202007	0.542184	0.831093	0.197311	0.658005	FALSE	0.299391
TRAM1L1	0.026914	0.202649	0.558458	0.920735	0.199007	0.7876	FALSE	0.301342
PDRG1	0.0163631	0.181216	0.606467	0.876673	0.199511	0.705853	FALSE	0.301342
KCNIP3	0.0319146	0.561584	0.542645	0.805698	0.199909	0.794659	FALSE	0.301342
RASEF	0.0250276	0.346217	0.567678	0.868553	0.20025	0.778587	FALSE	0.301342
MATN3	0.0371701	0.387896	0.527347	0.814354	0.20032	0.735164	FALSE	0.301342
ARPC4-TTLL3	0.000336028	0.0122956	0.844843	0.982291	0.200897	0.752802	FALSE	0.301691
NELFB	0.00379471	0.06304	0.722953	0.881451	0.20182	0.598603	FALSE	0.302116
RPL7L1	0.0340702	0.433843	0.539071	0.831801	0.201871	0.772222	FALSE	0.302116
TCEANC	0.0084415	0.148341	0.669957	0.905166	0.204739	0.727911	FALSE	0.305884
RPL5	0.0218851	0.318012	0.592557	0.852013	0.207712	0.746635	FALSE	0.309795
KCMF1	0.0177713	0.193726	0.612435	0.871595	0.208066	0.706624	FALSE	0.309795
TFDP1	0.0132028	0.341656	0.641044	0.891994	0.209715	0.805866	FALSE	0.311114
TET3	0.0338072	0.313975	0.552993	0.875429	0.210013	0.773645	FALSE	0.311114
ELP5	0.0332276	0.158778	0.554798	0.810859	0.21002	0.601394	FALSE	0.311114
VARS	0.0167034	0.175292	0.622072	0.8743	0.210709	0.698424	FALSE	0.311607
RPS16	0.0289593	0.288467	0.570593	0.794441	0.211141	0.665873	FALSE	0.311644
WDR93	0.036556	0.336161	0.54708	0.932699	0.211447	0.859675	FALSE	0.311644
SLC7A13	0.00687161	0.149478	0.697808	0.930591	0.213357	0.774761	FALSE	0.31336
NPFF	0.0385631	0.350019	0.545241	0.837537	0.213873	0.744045	FALSE	0.31336
NODAL	0.00765666	0.0734987	0.690574	0.856431	0.213899	0.574582	FALSE	0.31336
MYL10	0.0269463	1	0.582306	0.856109	0.214046	1	FALSE	0.31336
INPP5B	0.0379556	0.458028	0.550239	0.821409	0.21598	0.770961	FALSE	0.315663
PACS2	0.00463144	0.0771855	0.730407	0.940217	0.217196	0.734402	FALSE	0.316628
NEDD1	0.0191177	0.116595	0.620252	0.9394	0.217564	0.769526	FALSE	0.316628
DDX60	0.00187086	0.143418	0.785091	0.930526	0.217727	0.770617	FALSE	0.316628
KRTAP4-11	0.0354864	0.336524	0.561301	0.841831	0.218534	0.742988	FALSE	0.317273
ZDHHC11	0.0372001	0.27541	0.556999	0.816384	0.218956	0.683646	FALSE	0.317359
SLC25A47	0.0034386	0.11034	0.755048	0.913489	0.221721	0.711993	FALSE	0.320835
TCF20	0.0277362	0.311368	0.595401	0.851378	0.224505	0.742842	FALSE	0.324191
PWP2	0.0162892	0.21475	0.646136	0.966827	0.225487	0.882445	FALSE	0.324191
MAML1	0.00173118	0.0270417	0.798227	0.913219	0.225857	0.580855	FALSE	0.324191
PAF1	0.00670665	0.0959065	0.716692	0.968047	0.226095	0.82691	FALSE	0.324191
RPS2	0.0089156	0.119221	0.696467	0.907059	0.226523	0.708168	FALSE	0.324191
PFDN1	0.014259	0.169267	0.659587	0.882133	0.226936	0.705899	FALSE	0.324191
FRMPD2	0.00903154	0.322384	0.696123	0.901177	0.226994	0.810601	FALSE	0.324191
SPARC	0.00444741	0.105238	0.745607	0.891044	0.227117	0.667372	FALSE	0.324191
C1orf21	0.0297716	0.171138	0.592675	0.812416	0.227379	0.612965	FALSE	0.324191
ZFAND5	0.00660186	0.0695986	0.719965	0.951293	0.227764	0.753597	FALSE	0.324211
MARS	0.0163767	0.144199	0.652121	0.905881	0.230024	0.726102	FALSE	0.326897
ATG101	0.00282003	0.332972	0.777154	0.929018	0.230565	0.853264	FALSE	0.327081
POTEG	0.0122616	0.478757	0.67753	0.936487	0.230903	0.901636	FALSE	0.327081
BRD4	0.0182484	0.15209	0.647603	0.906447	0.233538	0.732765	FALSE	0.330279
OR13C8	0.0170984	0.250729	0.656823	0.885214	0.236069	0.75762	FALSE	0.333027
CEND1	0.010164	0.323215	0.699671	0.87575	0.236449	0.777957	FALSE	0.333027
TIMM23	0.00945693	0.162972	0.705356	0.927534	0.236624	0.777438	FALSE	0.333027
OGFRL1	0.022442	0.355376	0.634227	0.980172	0.237308	0.944051	FALSE	0.333453
HMOX2	0.0269618	0.247966	0.61954	0.810992	0.239156	0.66203	FALSE	0.33551
EEF2K	0.0241951	0.454598	0.637272	0.853476	0.244486	0.802485	FALSE	0.342089
PRCP	0.022629	0.202581	0.643652	0.951317	0.244629	0.844216	FALSE	0.342089
OVCA2	0.0127348	0.184411	0.696465	0.876857	0.247514	0.708211	FALSE	0.345075
PRSS33	0.033253	0.244406	0.610777	0.855156	0.247554	0.714094	FALSE	0.345075
KRT18	0.0139488	0.337817	0.691006	0.902759	0.248923	0.818455	FALSE	0.345564
SMIM3	0.0378771	0.484607	0.59943	0.885521	0.248934	0.846015	FALSE	0.345564
GTPBP4	0.0176358	0.142915	0.671742	0.872027	0.249091	0.671097	FALSE	0.345564
ZAR1	0.0216468	0.300666	0.656875	0.821095	0.251417	0.702183	FALSE	0.347723
GEMIN7	0.0280669	0.340697	0.632814	0.884821	0.251443	0.7964	FALSE	0.347723
TMEM91	0.0102239	0.121602	0.71895	0.927977	0.252047	0.7496	FALSE	0.348008
HCRT	0.00480235	0.0715754	0.771596	0.910195	0.253635	0.663015	FALSE	0.349649
SMIM22	0.0273523	0.31801	0.638827	0.883456	0.254054	0.785579	FALSE	0.349674
RPL9	0.0046116	0.073189	0.775746	0.97832	0.255204	0.844318	FALSE	0.350706
SERPINE1	0.0318266	0.27525	0.626689	0.828475	0.255901	0.697709	FALSE	0.351111
UFL1	0.0290158	0.459387	0.636496	0.924637	0.256501	0.882888	FALSE	0.351383
METTL21A	0.0145591	0.18024	0.697864	0.95894	0.25704	0.850906	FALSE	0.35157
WDR6	0.0293334	0.264152	0.643928	0.892307	0.262844	0.773964	FALSE	0.358947
API5	0.034731	0.5796	0.62805	0.815231	0.263313	0.809544	FALSE	0.359026
RPS20	0.0211108	0.198624	0.675614	0.962343	0.264079	0.866313	FALSE	0.359509
SIX1	0.00714929	0.0753155	0.758845	0.934903	0.264894	0.719799	FALSE	0.360058
GRP	0.0270227	0.659343	0.655624	0.929601	0.26586	0.930428	FALSE	0.360264
ZNF382	0.0326911	0.375359	0.637445	0.910604	0.26587	0.841566	FALSE	0.360264
MBD6	0.0152432	0.13538	0.705764	0.969929	0.266426	0.857258	FALSE	0.360459
THOC2	0.00422605	0.118383	0.794436	0.968384	0.268306	0.843194	FALSE	0.362441
EIF4A1	0.0279848	0.251827	0.656796	0.950515	0.269288	0.861624	FALSE	0.363206
FBXO24	0.0285521	0.274155	0.656168	0.941978	0.270261	0.854189	FALSE	0.363956
CD163	0.0119044	0.0767109	0.731251	0.949571	0.271905	0.757151	FALSE	0.365608
PGD	0.0330727	0.365547	0.647649	0.866005	0.274547	0.783285	FALSE	0.368593
RPS29	0.0128971	0.0896281	0.730734	0.899874	0.276647	0.666032	FALSE	0.370843
PLEKHF1	0.0376333	0.346079	0.640827	0.843347	0.279144	0.748938	FALSE	0.373617
HIST1H4C	0.0366187	0.477898	0.64468	0.843445	0.280022	0.800436	FALSE	0.373842
KLHL36	0.010045	0.102229	0.752651	0.880433	0.280167	0.64684	FALSE	0.373842
POLR2K	0.00513529	0.243239	0.796346	0.993261	0.281492	0.962704	FALSE	0.374509
RNPC3	0.0320185	0.532294	0.659656	0.859879	0.281525	0.83481	FALSE	0.374509
WDR59	0.0333795	0.476858	0.656651	0.848854	0.28231	0.805536	FALSE	0.374539
NAB2	0.0119104	0.133472	0.743053	0.893097	0.282404	0.696335	FALSE	0.374539
CFAP46	0.023456	0.159049	0.691228	0.882787	0.284123	0.699681	FALSE	0.376248
MPPE1	0.0205421	0.252214	0.703486	0.963706	0.284904	0.887618	FALSE	0.376712
SEC14L4	0.0135596	0.372685	0.736881	0.885238	0.285415	0.808927	FALSE	0.376816
CAV2	0.0165127	0.257028	0.723189	0.943953	0.286629	0.851556	FALSE	0.377629
ADD2	0.0251639	0.334851	0.688395	0.948637	0.286894	0.883787	FALSE	0.377629
NOP2	0.0298752	0.368669	0.674279	0.912916	0.288063	0.842425	FALSE	0.378439
NCAPG2	0.00323496	0.108545	0.827268	0.963914	0.288376	0.823934	FALSE	0.378439
TMEM215	0.0377129	0.338791	0.65431	0.820039	0.289948	0.719384	FALSE	0.379306
PDCD6IP	0.0210626	0.255057	0.707586	0.921067	0.290193	0.81261	FALSE	0.379306
NPM3	0.037653	0.179312	0.65522	0.963751	0.290552	0.86174	FALSE	0.379306
LHFPL4	0.0161261	0.301687	0.730225	0.857908	0.291234	0.746313	FALSE	0.379306
FUT4	0.0222027	0.264424	0.704755	0.972973	0.291569	0.910867	FALSE	0.379306
GINS3	0.0200125	0.310676	0.713492	0.90128	0.29164	0.806216	FALSE	0.379306
ANP32E	0.0165746	0.227678	0.729521	0.874182	0.292507	0.730271	FALSE	0.379868
ANAPC2	0.0172187	0.206068	0.728057	0.936845	0.293859	0.817739	FALSE	0.381058
DYNLRB2	0.0192026	0.312328	0.72156	0.936315	0.295784	0.857674	FALSE	0.382985
CCDC84	0.0121654	0.0628382	0.756589	0.918649	0.296383	0.667683	FALSE	0.383194
EIF4EBP1	0.0172058	0.196249	0.73329	0.907201	0.298537	0.761777	FALSE	0.385355
RPLP1	0.0130255	0.170013	0.754427	0.921967	0.298937	0.771531	FALSE	0.385355
SEC61A2	0.00636022	0.125975	0.802516	0.957227	0.300987	0.81786	FALSE	0.387427
CENPK	0.00905595	0.112688	0.782353	0.908836	0.302299	0.705561	FALSE	0.388543
TMEM80	0.014822	0.135798	0.749945	0.881406	0.303568	0.679576	FALSE	0.389515
CNGA3	0.032139	0.281837	0.686546	0.894486	0.303946	0.784952	FALSE	0.389515
INTS9	0.0221103	0.219288	0.720256	0.897984	0.304879	0.760017	FALSE	0.389574
HCFC1	0.00435	0.0756408	0.826661	0.924608	0.304992	0.697518	FALSE	0.389574
BNIPL	0.0295558	0.474992	0.695789	0.949469	0.30533	0.916888	FALSE	0.389574
SLC48A1	0.0141394	0.274129	0.756278	0.940561	0.306355	0.851776	FALSE	0.390312
RP1L1	0.0213328	0.21346	0.730252	0.934308	0.311331	0.816556	FALSE	0.396074
TAF1A	0.0124606	0.164067	0.773123	0.966814	0.314296	0.862682	FALSE	0.399266
USF1	0.0194524	0.143056	0.742626	0.917507	0.316099	0.745788	FALSE	0.400973
AKTIP	0.0314836	0.578116	0.704997	0.858393	0.318406	0.847581	FALSE	0.403314
PPT1	0.0208819	0.182635	0.743867	0.903579	0.322571	0.747971	FALSE	0.407998
MDM2	0.0212035	0.109831	0.743245	0.989534	0.323123	0.915493	FALSE	0.408106
ZFPM1	0.0224676	0.183164	0.739566	0.936257	0.323986	0.805307	FALSE	0.408605
CD300E	0.0316077	0.161154	0.712267	0.883513	0.325283	0.702304	FALSE	0.409217
MRPL43	0.0259113	0.337195	0.729595	0.91438	0.325537	0.833921	FALSE	0.409217
UTP15	0.0224081	0.311341	0.741746	0.954545	0.325875	0.88723	FALSE	0.409217
MRPS22	0.0319292	0.222097	0.71395	0.853174	0.327641	0.698864	FALSE	0.410844
HID1	0.023922	0.262207	0.739914	0.870106	0.329139	0.742877	FALSE	0.412132
PCBP2	0.036441	0.230604	0.705027	0.871723	0.330373	0.728507	FALSE	0.413084
RPS14	0.0247469	0.159567	0.739245	0.902575	0.331131	0.731465	FALSE	0.413441
SMC3	0.0189351	0.116282	0.762209	0.969727	0.333343	0.845878	FALSE	0.414979
TIGD1	0.021357	0.395475	0.753227	0.914414	0.333439	0.852713	FALSE	0.414979
RPS3A	0.00147949	0.0818481	0.8921	0.963756	0.333787	0.802018	FALSE	0.414979
RIN3	0.00277584	0.0376705	0.870226	0.987595	0.335599	0.851195	FALSE	0.416638
ANKRD10	0.0167548	0.0922941	0.773825	0.907997	0.336199	0.683808	FALSE	0.416791
ATP12A	0.0170883	0.23885	0.774627	0.913652	0.338504	0.793783	FALSE	0.419054
FAM160B2	0.0206908	0.0961958	0.762621	0.876653	0.340496	0.63427	FALSE	0.420924
ACSM5	0.0183094	0.381952	0.776213	0.95539	0.345365	0.905958	FALSE	0.42634
BCAR1	0.0307144	0.118	0.738061	0.864939	0.347313	0.638661	FALSE	0.42814
RPS7	0.0187266	0.273293	0.777483	0.975305	0.348433	0.918217	FALSE	0.42825
NCAPD2	0.0325446	0.18856	0.734515	0.950754	0.348648	0.836837	FALSE	0.42825
LHX2	0.0297604	0.246697	0.742281	0.909541	0.348872	0.791061	FALSE	0.42825
CRNKL1	0.0137084	0.153699	0.800651	0.930012	0.3508	0.776357	FALSE	0.430013
LEO1	0.0132952	0.174448	0.805382	0.936957	0.354032	0.801996	FALSE	0.433367
PAFAH1B2	0.03345	0.432758	0.73949	0.912227	0.355839	0.860914	FALSE	0.43497
MGRN1	0.0380505	0.180722	0.730076	0.932577	0.357599	0.797063	FALSE	0.436292
PSMD12	0.0155626	0.105355	0.79867	0.926996	0.357919	0.733829	FALSE	0.436292
GPN1	0.0167375	0.316992	0.795728	0.909222	0.360045	0.81956	FALSE	0.438272
UGT1A9	0.0337298	0.333357	0.744927	0.867704	0.361979	0.772256	FALSE	0.440013
GDI2	0.0357108	0.290218	0.741551	0.890527	0.363467	0.783175	FALSE	0.440862
PSMD14	0.0218572	0.131865	0.780907	1	0.364169	1	FALSE	0.440862
ACTR3B	0.00859113	0.0833171	0.839017	0.958476	0.364659	0.788003	FALSE	0.440862
TMEM130	0.00711136	0.146034	0.84866	0.966963	0.364695	0.854521	FALSE	0.440862
HMGN5	0.0378401	0.49264	0.738708	0.904961	0.365636	0.869135	FALSE	0.440922
RPL10A	0.0277556	0.272326	0.764425	0.950824	0.365754	0.86907	FALSE	0.440922
PI4KA	0.0222885	0.249738	0.782363	0.919566	0.367328	0.807964	FALSE	0.44221
C2CD2L	0.022355	0.143935	0.782703	0.968539	0.367943	0.857738	FALSE	0.442341
ADCY10	0.0045971	0.104815	0.872391	0.971928	0.370436	0.845389	FALSE	0.444727
NCSTN	0.00116242	0.0335914	0.919487	0.981122	0.372619	0.808186	FALSE	0.446734
EIF3J	0.0223275	0.157331	0.787952	0.952029	0.373711	0.824025	FALSE	0.447429
PSMD2	0.0193833	0.188696	0.800856	0.936007	0.377327	0.807693	FALSE	0.449677
NAT8	0.00330881	0.0586135	0.889442	0.968323	0.377352	0.79207	FALSE	0.449677
GOLGA8M	0.00428584	0.0503724	0.879855	0.975726	0.377806	0.809481	FALSE	0.449677
CEP131	0.00887147	0.282307	0.847138	0.96733	0.377953	0.903393	FALSE	0.449677
PSMC2	0.0269929	0.187233	0.778061	0.991044	0.378161	0.944836	FALSE	0.449677
SSRP1	0.0272877	0.772651	0.778265	0.923882	0.37929	0.946663	FALSE	0.450407
SCNN1D	0.0223967	0.59735	0.795518	0.934712	0.382623	0.923626	FALSE	0.453748
DPH6	0.0372617	0.288236	0.761461	0.887995	0.387773	0.778895	FALSE	0.459233
ZFYVE28	0.0121839	0.207534	0.839342	0.968511	0.390284	0.883919	FALSE	0.461581
PANK4	0.0332145	0.192198	0.774681	0.899954	0.39205	0.747923	FALSE	0.462838
HIPK1	0.0243705	0.281985	0.797992	0.895398	0.392417	0.78628	FALSE	0.462838
APOL6	0.0258	0.638673	0.794402	0.936551	0.392936	0.932826	FALSE	0.462838
TCF25	0.0136766	0.296558	0.835471	0.978	0.393745	0.929215	FALSE	0.463168
MAGEB6	0.0110708	0.110567	0.848373	0.985574	0.395705	0.898048	FALSE	0.464847
GPS1	0.0216889	0.596132	0.810942	0.939122	0.398463	0.927725	FALSE	0.467459
WBP4	0.0191632	0.127788	0.821284	0.961095	0.401449	0.828886	FALSE	0.470023
COL25A1	0.0166735	0.216658	0.829983	0.931583	0.401724	0.813191	FALSE	0.470023
TMEM234	0.0119535	0.155617	0.849409	0.949321	0.402886	0.817076	FALSE	0.470752
NLRP13	0.0161267	0.206704	0.833941	0.941663	0.404382	0.827034	FALSE	0.471869
NDUFB7	0.00553072	0.0564722	0.886909	0.961091	0.406781	0.765394	FALSE	0.474035
CENPI	0.0336	0.402661	0.788312	0.896536	0.408483	0.832889	FALSE	0.475385
THRA	0.0288514	0.438335	0.802368	0.939713	0.411861	0.896593	FALSE	0.478678
UBQLN1	0.0154447	0.111698	0.842783	0.962707	0.413117	0.822757	FALSE	0.479501
ADPRM	0.0181434	0.134355	0.835361	0.925802	0.415621	0.755042	FALSE	0.48169
TNFSF9	0.011607	0.23639	0.859901	0.984919	0.416105	0.934511	FALSE	0.48169
2001-09-01	0.0141941	0.365812	0.851435	0.986959	0.418896	0.959817	FALSE	0.48428
SLC39A4	0.0088211	0.183017	0.875964	0.966425	0.421149	0.86975	FALSE	0.485978
RAB15	0.0100599	0.0683782	0.870223	0.981286	0.421477	0.852447	FALSE	0.485978
AGPAT5	0.0228621	0.211571	0.827857	0.940673	0.424422	0.827352	FALSE	0.488323
IRAK1	0.0325913	0.217396	0.80481	0.961311	0.425459	0.871061	FALSE	0.488323
MAPK3	0.0287243	0.198497	0.814004	0.970644	0.425864	0.885985	FALSE	0.488323
PSMD3	0.0376984	0.593392	0.794826	0.934836	0.426427	0.923006	FALSE	0.488323
SMC4	0.0232078	0.250022	0.828667	0.939944	0.42675	0.841891	FALSE	0.488323
CLK2	0.0146233	0.22747	0.855274	0.964767	0.426863	0.882077	FALSE	0.488323
PSD4	0.0209773	0.192697	0.838049	0.93086	0.431098	0.800221	FALSE	0.492387
PROS1	0.00939296	0.204669	0.87943	0.986931	0.431543	0.93381	FALSE	0.492387
TAF6	0.0229918	0.177523	0.837075	0.925162	0.437374	0.781678	FALSE	0.497775
NDC80	0.0130118	0.141665	0.868165	0.935901	0.437642	0.780185	FALSE	0.497775
CA10	0.0237075	0.261976	0.835641	0.946541	0.437974	0.857913	FALSE	0.497775
CELA2A	0.0249466	0.220505	0.834501	0.935759	0.440723	0.822334	FALSE	0.50025
POLR3B	0.0223679	0.29319	0.845021	0.959522	0.446249	0.891175	FALSE	0.505865
CNPY2	0.0277169	0.279481	0.832634	0.957532	0.447218	0.883587	FALSE	0.506306
TMEM67	0.0236336	0.1929	0.844266	0.927689	0.449801	0.794618	FALSE	0.508572
LIPE	0.0165872	0.129398	0.864172	0.958427	0.450428	0.823044	FALSE	0.508623
EHD3	0.0266972	0.617274	0.840854	0.972455	0.455376	0.964614	FALSE	0.512915
SDHC	0.0287224	0.558025	0.83633	0.929597	0.455403	0.910767	FALSE	0.512915
LYRM2	0.0049629	0.0494858	0.916027	0.977424	0.456509	0.815449	FALSE	0.513499
PEX14	0.0145713	0.254122	0.877111	0.976958	0.461142	0.917582	FALSE	0.517454
HMGCS1	0.00302483	0.0396811	0.931869	0.987644	0.461209	0.854285	FALSE	0.517454
IPPK	0.0315234	0.208542	0.837028	0.979826	0.464587	0.913302	FALSE	0.520576
PSMA3	0.00299284	0.126537	0.935922	0.985775	0.471343	0.9059	FALSE	0.52747
CAPN15	0.0104511	0.156098	0.898434	0.972898	0.473905	0.875557	FALSE	0.529323
RAPGEFL1	0.0102677	0.138708	0.89928	0.984851	0.474211	0.907096	FALSE	0.529323
NIPSNAP3B	0.000375548	0.029129	0.972269	1	0.481968	1	FALSE	0.537296
DYNC1H1	0.038213	0.303971	0.838489	0.966734	0.484105	0.907563	FALSE	0.538991
GFOD2	0.0124262	0.122224	0.897601	0.9723	0.485565	0.857143	FALSE	0.539329
DCLRE1A	0.0264287	0.152788	0.861844	0.968605	0.485643	0.862213	FALSE	0.539329
PKD2L1	0.0205112	0.19533	0.87739	0.967143	0.489362	0.876268	FALSE	0.54277
CCDC65	0.0151242	0.171507	0.89328	0.974354	0.492811	0.885916	FALSE	0.545902
COL20A1	0.0138847	0.391069	0.89748	0.951312	0.494011	0.901851	FALSE	0.546539
2008-03-01	0.0175733	0.186023	0.888152	0.947307	0.49547	0.828524	FALSE	0.54746
NUBP1	0.027056	0.222735	0.869287	0.958132	0.499528	0.866248	FALSE	0.551247
C15orf39	0.010911	0.207385	0.910063	0.977591	0.500753	0.906834	FALSE	0.551902
ERICH4	0.0258638	0.18469	0.87309	0.960346	0.501849	0.856061	FALSE	0.552413
HAUS1	0.0297095	0.234262	0.866303	0.973993	0.502943	0.905327	FALSE	0.552921
ACTL8	0.0179572	0.127124	0.892255	0.962409	0.504761	0.831931	FALSE	0.554223
HERC5	0.0257925	0.21795	0.876337	0.965499	0.507034	0.88051	FALSE	0.555856
KANK2	0.0364787	0.262384	0.857392	0.961725	0.507521	0.886634	FALSE	0.555856
MPHOSPH6	0.034808	0.281104	0.862665	0.956296	0.511399	0.88177	FALSE	0.559013
WDSUB1	0.0126331	0.293675	0.909892	0.988482	0.511682	0.95441	FALSE	0.559013
HMGB1	0.0102654	0.280037	0.91948	0.977115	0.516933	0.92382	FALSE	0.564045
PSMB2	0.00517673	0.12017	0.941344	0.995038	0.523883	0.948954	FALSE	0.570915
POMT2	0.0346072	0.486831	0.874223	0.961213	0.529524	0.934165	FALSE	0.575872
PLD1	0.0308321	0.176729	0.880485	0.939047	0.52975	0.807303	FALSE	0.575872
AVPR1A	0.00734567	0.133704	0.936144	0.983047	0.533972	0.898437	FALSE	0.579741
POLR2D	0.0181447	0.548234	0.908349	0.962775	0.53727	0.945381	FALSE	0.582598
GRB2	0.034306	0.348402	0.880061	0.96313	0.538587	0.911148	FALSE	0.583303
RAPH1	0.0386487	0.287613	0.875	0.954127	0.540921	0.879745	FALSE	0.585105
TRRAP	0.026258	0.236208	0.895001	0.955294	0.541824	0.865321	FALSE	0.585358
TDRP	0.0321312	0.262747	0.886787	0.947245	0.54447	0.859439	FALSE	0.58749
FAM200B	0.00793744	0.173736	0.939524	0.983599	0.549057	0.914603	FALSE	0.591709
ZNF284	0.0357714	0.29877	0.884818	0.971756	0.550636	0.916349	FALSE	0.592081
C4orf46	0.0173904	0.280392	0.916223	0.975887	0.550758	0.921122	FALSE	0.592081
PRR19	0.0109022	0.197324	0.933164	0.988987	0.555167	0.939238	FALSE	0.596089
RANBP10	0.0114415	0.239201	0.93385	0.977726	0.560637	0.915818	FALSE	0.601223
IGFBP3	0.0249034	0.28309	0.907623	1	0.562116	1	FALSE	0.602071
C3orf35	0.0321845	0.558295	0.896836	0.988139	0.56309	0.978672	FALSE	0.602375
C20orf78	0.0325073	0.28163	0.899085	0.981207	0.568266	0.933746	FALSE	0.607169
MAP3K10	0.017912	0.517064	0.923601	0.996994	0.570033	0.991667	FALSE	0.608313
NOC3L	0.0252296	0.144846	0.912388	0.98364	0.573186	0.904967	FALSE	0.610933
RAMP2	0.0340874	0.32885	0.900439	0.988554	0.575092	0.9592	FALSE	0.612218
S100A13	0.0251819	0.214964	0.914062	0.978386	0.57661	0.91114	FALSE	0.613086
OR4D1	0.0250803	0.197699	0.917601	1	0.584004	1	FALSE	0.619792
DIP2B	0.0114648	0.0763141	0.942325	0.972724	0.584335	0.826151	FALSE	0.619792
SDHA	0.0190246	0.279385	0.929127	0.993047	0.588256	0.966331	FALSE	0.623043
TGS1	0.0174686	0.106514	0.93206	0.979835	0.588825	0.873445	FALSE	0.623043
MED13	0.0207887	0.249259	0.927427	0.967896	0.591257	0.895632	FALSE	0.624859
SCGB2A2	0.0170713	0.289339	0.936158	0.987349	0.597725	0.950701	FALSE	0.630932
EFNB3	0.024305	0.205242	0.92524	0.963514	0.598857	0.871491	FALSE	0.631276
HOXC10	0.0276151	0.17193	0.920887	0.96101	0.599496	0.85196	FALSE	0.631276
KHSRP	0.0127792	0.110491	0.946438	0.979973	0.604766	0.876168	FALSE	0.63606
KRT7	0.0186388	0.135347	0.936661	1	0.606009	1	FALSE	0.636601
WT1	0.0202014	0.322899	0.934511	0.986065	0.606757	0.952285	FALSE	0.636622
CIR1	0.0198022	0.365308	0.936713	0.984733	0.610962	0.95491	FALSE	0.640265
DKK4	0.00658759	0.0911465	0.962267	0.987302	0.612284	0.8958	FALSE	0.640881
HIST1H2BN	0.0162886	0.191852	0.946496	0.996531	0.623378	0.970776	FALSE	0.651714
2008-09-01	0.0379856	0.259597	0.920822	0.983446	0.626844	0.935132	FALSE	0.654554
FITM1	0.0235386	0.335893	0.939358	1	0.631923	1	FALSE	0.658752
TRPV3	0.00215298	0.0542352	0.980217	0.992871	0.632372	0.90442	FALSE	0.658752
ZNF837	0.00278415	0.118959	0.978061	0.987132	0.634081	0.908392	FALSE	0.659746
PIK3C2A	0.0264303	0.286702	0.938185	0.977901	0.638168	0.927006	FALSE	0.663209
CHST15	0.0222717	0.229462	0.94362	0.994348	0.639345	0.965178	FALSE	0.663643
NFKBID	0.0184428	0.188465	0.949733	0.97832	0.642821	0.903058	FALSE	0.666031
SMG6	0.0222653	0.172217	0.944959	0.980054	0.643169	0.902839	FALSE	0.666031
ERI1	0.0294746	0.304612	0.938547	0.996469	0.648054	0.980714	FALSE	0.670295
PRPF3	0.0266625	0.298476	0.942329	0.978471	0.650111	0.93064	FALSE	0.671628
LIN7C	0.0310518	0.194872	0.938737	0.991002	0.652853	0.946234	FALSE	0.673664
C16orf86	0.010332	0.293394	0.972284	0.994053	0.68704	0.971163	FALSE	0.708105
LDHAL6A	0.0369045	0.337078	0.947833	0.994782	0.691909	0.977236	FALSE	0.712283
ZNF514	0.038949	0.174241	0.947416	0.989189	0.695116	0.934597	FALSE	0.714743
ASB10	0.0363975	0.213696	0.949979	0.989772	0.696986	0.945375	FALSE	0.715823
PCIF1	0.0300559	0.166299	0.955522	0.98463	0.698841	0.91578	FALSE	0.716886
SHROOM2	0.019188	0.146411	0.968323	1	0.712046	1	FALSE	0.729576
KCNS3	0.0316356	0.207948	0.958971	1	0.714056	1	FALSE	0.730778
DKKL1	0.0322583	0.186778	0.960631	0.982093	0.721137	0.913728	FALSE	0.737162
SHQ1	0.0245383	0.526835	0.96987	0.988831	0.735786	0.97762	FALSE	0.751258
ZC3H11A	0.0348959	0.303939	0.966552	0.984386	0.748002	0.945381	FALSE	0.76284
C5orf60	0.0106138	0.0999504	0.983384	0.994656	0.75087	0.940415	FALSE	0.764873
ZNF763	0.0368741	0.207959	0.967734	0.987391	0.756402	0.93607	FALSE	0.76961
CDH1	0.0340479	0.250442	0.977367	0.988677	0.790816	0.948351	FALSE	0.803306
PPL	0.0256554	0.368654	0.981101	0.997037	0.791358	0.986358	FALSE	0.803306
GDF11	0.0318923	0.16865	0.982497	0.994232	0.812224	0.955218	FALSE	0.823531
POU5F1B	0.00594095	0.0722747	0.994582	1	0.82434	1	FALSE	0.834847
STRAP	0.0301592	0.184431	0.986669	0.994984	0.83323	0.961677	FALSE	0.84232
OGFR	0.0111945	0.364374	0.992955	0.997183	0.833646	0.986649	FALSE	0.84232
ASB7	0.0204763	0.248584	0.990672	0.995953	0.841563	0.974089	FALSE	0.849338
ULBP2	0.0220194	0.172227	0.99047	1	0.843584	1	FALSE	0.850395
CTTN	0.0313079	0.333619	0.990658	1	0.862634	1	FALSE	0.868596
C10orf62	0.00832115	0.103978	0.996647	1	0.871616	1	FALSE	0.876631
TUBE1	0.0314084	0.376936	0.99326	0.995986	0.884107	0.983465	FALSE	0.888172
MDM4	0.0368511	0.247254	0.994418	1	0.901422	1	FALSE	0.904526
TOM1	0.0342287	0.326337	0.995744	0.996744	0.91206	0.983115	FALSE	0.914079
RABEPK	0.0275941	0.304978	0.996468	1	0.913033	1	FALSE	0.914079
AKIRIN2	0.0169281	0.168545	1	1	1	1	FALSE	1
FAM86C1	1.31703e-05	0.00077016					FALSE
TBC1D3L	9.15794e-05	0.00164902					FALSE
NBPF9	0.000394797	0.0117438					FALSE
RPL17-C18orf32	0.00111051	0.0271024					FALSE
FAM120A	0.00167398	0.0357795					FALSE
ZNF93	0.00253776	0.0244184					FALSE
GOLGA8R	0.0032021	0.127694					FALSE
FCGR1B	0.00341961	0.0825975					FALSE
POTEM	0.00349998	0.03215					FALSE
TSPY8	0.00363245	0.211442					FALSE
AGAP9	0.00364389	0.0815615					FALSE
RGPD8	0.00551305	0.284797					FALSE
SLC35E2B	0.00673954	0.100164					FALSE
RIPOR3	0.00761406	0.0483392					FALSE
SEM1	0.00800436	0.266496					FALSE
CCDC74B	0.00804358	0.091274					FALSE
THAP12	0.00832725	0.109437					FALSE
SPATA31C2	0.00895773	0.128593					FALSE
DUX4	0.00898159	0.0520448					FALSE
FAM86B2	0.00979157	0.201039					FALSE
IK	0.0101575	0.0803914					FALSE
FXYD6-FXYD2	0.0104314	0.298268					FALSE
NDUFAF8	0.011066	0.195937					FALSE
FRG2C	0.0113978	0.107866					FALSE
INTS11	0.0118808	0.185191					FALSE
EFL1	0.012535	0.236158					FALSE
ZNF778	0.0131352	0.20339					FALSE
CNOT9	0.0136053	0.181066					FALSE
WASHC2C	0.013713	0.113369					FALSE
PNKP	0.0149485	0.134263					FALSE
MAP1LC3B2	0.0155814	0.0986761					FALSE
WDR74	0.0157842	0.116657					FALSE
MARK2	0.0165248	0.0948329					FALSE
RNF103-CHMP3	0.0165959	0.0863374					FALSE
RACK1	0.0172631	0.10295					FALSE
CNMD	0.0180034	0.17869					FALSE
ZFYVE19	0.0195045	0.113849					FALSE
ELP1	0.0196555	0.229261					FALSE
CLNS1A	0.020032	0.354042					FALSE
TSC22D2	0.0211333	0.203772					FALSE
EIF3CL	0.021252	0.19708					FALSE
THOC3	0.021698	0.139587					FALSE
OR4F6	0.0224271	0.372807					FALSE
PPIAL4G	0.0231304	0.0735386					FALSE
SELENOK	0.0233559	0.602593					FALSE
HIST2H2AC	0.0233978	0.183878					FALSE
TPCN1	0.023894	0.354475					FALSE
GPR75-ASB3	0.0239895	0.160004					FALSE
ZBTB48	0.0245584	0.251752					FALSE
RAVER1	0.0249478	0.12613					FALSE
SNX21	0.0256118	0.271849					FALSE
LSM2	0.0256513	0.103299					FALSE
RUNX3	0.0265634	0.226283					FALSE
ZNF579	0.0277222	0.186523					FALSE
HAUS5	0.0277617	0.229963					FALSE
NOP16	0.0281822	0.176863					FALSE
MYL4	0.0287813	0.169763					FALSE
UPK3BL1	0.0289131	0.404072					FALSE
NOP53	0.0289587	0.1626					FALSE
CTCF	0.0291956	0.281775					FALSE
NEDD8-MDP1	0.029224	0.143598					FALSE
UBE2Q2L	0.0292374	0.250899					FALSE
FAAP100	0.0293341	0.383491					FALSE
SIDT2	0.029436	0.334378					FALSE
ZNF343	0.029758	0.445475					FALSE
ZNF174	0.0307046	0.243982					FALSE
SNIP1	0.0313446	0.319153					FALSE
STK39	0.0313746	0.16471					FALSE
EMILIN3	0.0314905	0.221676					FALSE
TYR	0.0317052	0.238276					FALSE
PEX1	0.0318551	0.214472					FALSE
ADGRL3	0.0319855	0.267855					FALSE
NIFK	0.0320646	0.207454					FALSE
PRAMEF33	0.0322878	0.226933					FALSE
OVOL2	0.0323088	0.45576					FALSE
SLIT3	0.0323626	0.21078					FALSE
TMEM106B	0.0324819	0.35205					FALSE
ISY1-RAB43	0.0326408	0.15557					FALSE
C2CD4B	0.0327154	0.329252					FALSE
CDKL3	0.0327856	0.144966					FALSE
MSANTD1	0.0329601	0.255482					FALSE
HOXC5	0.033353	0.220377					FALSE
CRAMP1	0.0333566	0.45326					FALSE
SF3B4	0.0333933	0.170277					FALSE
CAVIN4	0.0335391	0.314194					FALSE
JMJD7-PLA2G4B	0.0335605	0.224118					FALSE
SUPT5H	0.0336807	0.335615					FALSE
IFITM3	0.0337211	0.418574					FALSE
MOB4	0.0338391	0.221893					FALSE
MED11	0.0342164	0.428759					FALSE
ZMYND11	0.0343384	0.194744					FALSE
CTSF	0.0343415	0.45206					FALSE
LRR1	0.0343716	0.349881					FALSE
SYTL3	0.0344477	0.271443					FALSE
HOXA9	0.0346395	0.226225					FALSE
HINFP	0.0348713	0.262612					FALSE
FOXL2	0.0351549	0.229108					FALSE
CNTD2	0.0353215	0.18654					FALSE
GTF3C1	0.0355151	0.165651					FALSE
KDR	0.0355273	0.253827					FALSE
RPL26	0.0357818	0.418192					FALSE
NUDT16L1	0.0360995	0.251016					FALSE
FOLH1B	0.0361911	0.298614					FALSE
OR5H15	0.0362115	0.210259					FALSE
DENND6B	0.0365211	0.248356					FALSE
KMT2C	0.0366232	0.175028					FALSE
CEP295	0.0368433	0.165236					FALSE
KIF23	0.0369093	0.568094					FALSE
KCNF1	0.036989	0.434347					FALSE
LRRC38	0.0370964	0.311224					FALSE
NFRKB	0.0371206	0.197874					FALSE
RBM22	0.0371238	0.373323					FALSE
USP7	0.0372041	0.194331					FALSE
MMS22L	0.0374517	0.275451					FALSE
POLR2L	0.0375181	0.167423					FALSE
ARL10	0.0377323	0.203762					FALSE
TRIM16	0.03801	0.200422					FALSE
LTB4R	0.0380785	0.2641					FALSE
BUD23	0.0381666	0.269895					FALSE
SNU13	0.0381696	0.195673					FALSE
C11orf91	0.0382819	0.22836					FALSE
SLC26A11	0.0387723	0.200985					FALSE
HDHD5	0.0388455	0.216141					FALSE
MRPL52	0.0390393	0.177526					FALSE
TSPYL5	0.0390763	0.354023					FALSE
S100A7A	0.0393401	0.143257					FALSE
LSM11	0.0393985	0.256518					FALSE
ACTG1	0.0394469	0.268098	0.397794	0.64813			FALSE
TMTC2	0.0395772	0.257478	0.469092	0.706776			FALSE
PRAMEF9	0.0396266	0.159052					FALSE
PDLIM2	0.0396566	0.20983	0.828965	0.954886			FALSE
AIFM3	0.0398342	0.187744	0.738206	0.885728			FALSE
MED30	0.0398805	0.237848					FALSE
RASL11B	0.0400207	0.318818					FALSE
CHST8	0.0400521	0.361156					FALSE
NPW	0.040126	0.280071	0.721053	0.908635			FALSE
LCN10	0.0401296	0.515169					FALSE
RPS15	0.0401926	0.44985	0.0735476	0.30022			FALSE
DCLRE1B	0.0402012	0.226952					FALSE
POLR2E	0.0402973	0.163092	0.3725	0.639432			FALSE
VPS41	0.0403121	0.240315					FALSE
VCP	0.0403126	0.290327	0.535911	0.835142			FALSE
PDE4DIP	0.0403616	0.250939	0.797474	0.957356			FALSE
CHMP7	0.0403633	0.37393					FALSE
KRI1	0.0404048	0.179724					FALSE
KATNB1	0.0404972	0.397138	0.821529	0.921385			FALSE
TRIM47	0.0405466	0.335443	0.971065	0.986463			FALSE
ATP5D	0.0405558	0.446024	0.0941755	0.368575			FALSE
YPEL5	0.0405902	0.277206	0.678941	0.891705			FALSE
TPRKB	0.040725	0.274038	0.318971	0.602793			FALSE
GRPEL1	0.0407752	0.206691	0.909348	1			FALSE
C22orf39	0.0407856	0.237478					FALSE
GNAI2	0.0408009	0.331502	0.643173	0.910821			FALSE
MTRNR2L4	0.0408663	0.334387	0.976576	1			FALSE
TMED4	0.0408815	0.246904	0.837204	0.94634			FALSE
CKAP5	0.0408988	0.382252	0.966703	0.985339			FALSE
GSDMA	0.0409497	0.291234	0.271345	0.60633			FALSE
TP73	0.0409733	0.364088					FALSE
HCN2	0.0410675	0.315126					FALSE
NARS	0.0411166	0.229924	0.0829243	0.292628			FALSE
ZNF622	0.0411933	0.509397	0.961449	0.992613			FALSE
SMIM2	0.0412517	0.31675	0.855927	0.970627			FALSE
ANKRD27	0.0412612	0.443165					FALSE
ASNA1	0.0413591	0.551346	0.0951925	0.273014			FALSE
HNRNPA1L2	0.0414055	0.172757					FALSE
RUVBL1	0.0414215	0.511492	0.409905	0.722919			FALSE
CCNH	0.0414386	0.175139					FALSE
HSPA1B	0.0414642	0.36828					FALSE
URI1	0.0414673	0.286244	0.643119	0.845962			FALSE
ARFGEF2	0.0414836	0.504803	0.414016	0.715569			FALSE
DDX56	0.0415253	0.267153	0.358646	0.703199			FALSE
CNTRL	0.0415523	0.320819	0.715846	0.868521			FALSE
IGF2R	0.0415528	0.214366					FALSE
SNRPF	0.0415686	0.391831	0.158322	0.412975			FALSE
TMEM179B	0.0415857	0.263514	0.586987	0.767033			FALSE
ERMP1	0.0416137	0.276655	0.355623	0.566772			FALSE
KCNJ5	0.0416213	0.383791	0.696535	0.847453			FALSE
CA7	0.0416484	0.273505	0.8876	0.948642			FALSE
SLC2A3	0.0416895	0.290682	0.0871138	0.2278			FALSE
RPS28	0.0416901	0.179699	0.241003	0.946528			FALSE
DNAH10	0.0417995	0.245552					FALSE
TSEN34	0.0418339	0.275686					FALSE
ZC3H10	0.0419157	0.203572	0.878064	0.961454			FALSE
TRIT1	0.0419393	0.420292					FALSE
CYP4A22	0.041966	0.383322	0.918661	0.962871			FALSE
OR4K1	0.0419726	0.266514	0.868446	0.963933			FALSE
SLC30A3	0.0421733	0.17756	0.437792	0.677958			FALSE
ATXN7L3	0.0421741	0.189602					FALSE
NPB	0.0421847	0.292243					FALSE
DOPEY2	0.0423663	0.30513	0.497978	0.691779			FALSE
VN1R2	0.042387	0.558381					FALSE
CTHRC1	0.042512	0.24479	0.298223	0.622489			FALSE
FAM50B	0.0425144	0.187523					FALSE
C7orf50	0.0425325	0.215115					FALSE
ANKRD49	0.0427658	0.323735					FALSE
BNC1	0.0427713	0.356914					FALSE
PSMB4	0.0427914	0.335526	0.65116	0.876726			FALSE
GAPDH	0.0428465	0.409381	0.562025	0.824419			FALSE
KIF13A	0.0428768	0.18664					FALSE
LEFTY1	0.0429348	0.21774	0.0548255	0.193931			FALSE
PHC1	0.0430025	0.245477					FALSE
COX15	0.0430072	0.433618	0.136262	0.446989			FALSE
PSME1	0.0431942	0.32155	0.409309	0.815479			FALSE
PHB2	0.043202	0.36295	0.254382	0.658187			FALSE
UBA1	0.0433081	0.472221	0.206769	0.441668			FALSE
DPF2	0.0433969	0.230131					FALSE
SRGAP3	0.0434094	0.202094					FALSE
CD160	0.0435379	0.309945	0.37633	0.75199			FALSE
HNRNPAB	0.0435431	0.331155	0.0208575	0.237044			FALSE
KREMEN2	0.0435585	0.305914					FALSE
RNF212B	0.0435677	0.193074					FALSE
LCE3E	0.0437361	0.172095					FALSE
IGSF11	0.0437876	0.15599	0.296043	0.6589			FALSE
RNF4	0.0437929	0.262983					FALSE
ALOX5	0.043928	0.372642	0.964696	0.989136			FALSE
HEY2	0.0439772	0.33193	0.798456	0.942906			FALSE
SMC1B	0.0439857	0.484474					FALSE
SPEG	0.0439968	0.250907	0.721882	0.916475			FALSE
PIGL	0.044026	0.621988					FALSE
EWSR1	0.0440275	0.34113	0.800138	0.885246			FALSE
SUPT6H	0.0441446	0.343172	0.439483	0.948115			FALSE
SBSN	0.0442145	0.248523					FALSE
PDS5A	0.0442754	0.338421	0.45192	0.689676			FALSE
LILRA4	0.0442869	0.249245					FALSE
OR6C70	0.0442986	0.331467	0.558695	0.788811			FALSE
TFIP11	0.0443536	0.180958					FALSE
ABCF1	0.0443882	0.319678	0.557463	0.855566			FALSE
QRICH1	0.0444126	0.214851					FALSE
WDR18	0.0444536	0.406534	0.358127	0.699401			FALSE
RTP2	0.0445491	0.418565					FALSE
KARS	0.0445569	0.375795	0.717672	0.922669			FALSE
ARHGEF40	0.0446616	0.28023	0.472448	0.775582			FALSE
PRR22	0.0446928	0.434349					FALSE
ORM1	0.0447604	0.413367	0.37491	0.764097			FALSE
PI16	0.0447694	0.187978					FALSE
SH3D21	0.0448069	0.599907					FALSE
SOX15	0.0448426	0.372728					FALSE
KLF5	0.0448675	0.544365	0.580554	0.890486			FALSE
ELOC	0.0449602	0.238825					FALSE
MSC	0.0450015	0.572743	0.725573	0.870336			FALSE
NDUFA9	0.0451555	0.234122					FALSE
WDR55	0.0451871	0.216016					FALSE
OGDHL	0.0452847	0.539188	0.718528	0.954305			FALSE
TMEM63A	0.0453238	0.272075					FALSE
MYOD1	0.0453268	0.299566	0.685564	0.894982			FALSE
MAX	0.0454164	0.31402	0.219704	0.482847			FALSE
OSGIN1	0.0454188	0.238421					FALSE
ANKRD6	0.0455584	0.238477					FALSE
KIF18B	0.0456033	0.209244	0.254545	0.566157			FALSE
IARS	0.0456538	0.61635	0.569483	0.863868			FALSE
NME4	0.0457132	0.434903					FALSE
FIS1	0.0457287	0.199079	0.586203	0.86324			FALSE
BUB3	0.0457986	0.31378	0.138791	0.313091			FALSE
MCM4	0.0459117	0.179126	0.674536	0.933333			FALSE
DAPK1	0.0459815	0.34321					FALSE
RASGRP1	0.046012	0.41804	0.721763	0.925318			FALSE
HNRNPM	0.0460313	0.287703					FALSE
HIST1H4E	0.0460471	0.549653					FALSE
RDH13	0.0460651	0.257465					FALSE
USP50	0.0460938	0.255091					FALSE
CCL5	0.0461462	0.370033					FALSE
NVL	0.0462106	0.235571					FALSE
LIMS1	0.0462268	0.306614					FALSE
ZC3H18	0.0462823	0.370774					FALSE
PTDSS1	0.0462929	0.447147					FALSE
YY1	0.0463335	0.528016					FALSE
LAT2	0.0464305	0.433105	0.989184	1			FALSE
PRPF38A	0.0464797	0.431115	0.191594	0.402889			FALSE
USP3	0.0465712	0.369525	0.92976	0.996846			FALSE
KRT6C	0.0465802	0.236281					FALSE
SNUPN	0.0466961	0.398149					FALSE
TLCD2	0.0467567	0.440523	0.93872	0.9828			FALSE
GBP1	0.0467609	0.569652	0.944016	0.96971			FALSE
GRHL3	0.0467861	0.299267	0.987915	0.996554			FALSE
RPRML	0.0467985	0.248802					FALSE
MKNK1	0.0468283	0.534192	0.742035	0.842558			FALSE
TMEM198	0.0469812	0.480397	0.587944	0.867628			FALSE
MYT1L	0.0469882	0.403393					FALSE
SARS2	0.0470179	0.166722					FALSE
WNT9A	0.0470692	0.412508					FALSE
PCDHB3	0.0470764	0.440506					FALSE
TOP1	0.0470984	0.305308					FALSE
USP30	0.0471996	0.525926					FALSE
ALDOA	0.0472451	0.237915	0.559828	0.85774			FALSE
NUTF2	0.0472681	0.331746	0.170093	0.362776			FALSE
CABP2	0.0472731	0.180173					FALSE
KRT27	0.0472886	0.299001					FALSE
PKNOX1	0.04733	0.224234	0.321064	0.639687			FALSE
PTBP1	0.0473524	0.247375	0.00783744	0.042119			FALSE
NDUFA8	0.0474645	0.261662	0.291905	0.596524			FALSE
C21orf33	0.0474664	0.57165					FALSE
LCP2	0.0474926	0.493638					FALSE
MEPCE	0.0475029	0.334127	0.368488	0.656225			FALSE
ZSCAN16	0.0475298	0.407524					FALSE
FAM122A	0.0476146	0.375035					FALSE
WDR45B	0.0476682	0.391871					FALSE
ARNT	0.0477461	0.440294					FALSE
KHDC3L	0.0477856	0.236149					FALSE
HADHB	0.0477986	0.191619	0.0596077	0.186896			FALSE
TMA16	0.0479429	0.412432	0.9012	0.988112			FALSE
TUBB4A	0.0479463	0.214871	0.664555	0.813387			FALSE
TUSC5	0.0480395	0.310366					FALSE
C1orf109	0.0480684	0.226357					FALSE
MTMR3	0.0481423	0.491096					FALSE
TRIM61	0.0482169	0.438174					FALSE
SEC24A	0.0482813	0.321646	0.55711	0.98788			FALSE
ANAPC15	0.0482996	0.340419					FALSE
JADE1	0.0483157	0.275482					FALSE
BICD1	0.0483452	0.418449	0.912344	0.986454			FALSE
C15orf53	0.048415	0.203682					FALSE
HSPB2	0.0484648	0.317667					FALSE
HOXA10	0.0486149	0.288681					FALSE
CLEC2A	0.0486571	0.303012					FALSE
GPATCH4	0.0486605	0.206525	0.406112	0.811592			FALSE
SEMA7A	0.0486796	0.475112					FALSE
ADAP2	0.0487576	0.176535	0.859511	0.952303			FALSE
KLF3	0.0487881	0.398376					FALSE
CAPZB	0.0487905	0.214209	0.644304	0.86439			FALSE
EIF4E2	0.0487908	0.408474					FALSE
SPATA5L1	0.0488547	0.301008					FALSE
PEX5L	0.0489613	0.376592					FALSE
BIRC5	0.0490132	0.340216					FALSE
URAD	0.0490135	0.185644	0.257883	0.496419			FALSE
HAPLN2	0.0490203	0.284842	0.367959	0.66497			FALSE
ACER2	0.0490959	0.189374					FALSE
DMP1	0.0491096	0.330947					FALSE
LPCAT3	0.0492904	0.447218	0.963702	0.986676			FALSE
TAPT1	0.0493338	0.254424	0.492521	0.67912			FALSE
ZC3H12A	0.0493387	0.593687					FALSE
IL11	0.0494009	0.385901					FALSE
MTMR11	0.0495402	0.305403					FALSE
KCNK15	0.0495579	0.265114					FALSE
P2RY8	0.0495582	0.199735					FALSE
CT47B1	0.0495918	0.212887					FALSE
EXOSC2	0.0497271	0.257595					FALSE
ETNK1	0.0497464	0.51691					FALSE
ADAM8	0.0497498	0.368315					FALSE
ME3	0.0497832	0.47658					FALSE
TTF2	0.0499543	0.546579					FALSE
LDLR	0.0500006	0.398253					FALSE
PHF12	0.0500523	0.516295					FALSE
PHB	0.0500742	0.245627	0.48238	0.822487			FALSE
C5orf24	0.0500774	0.273868					FALSE
TSFM	0.0501993	0.37243					FALSE
ARMC6	0.0502003	0.323912	0.744252	0.885209			FALSE
MADD	0.0502343	0.241553					FALSE
KRTAP9-9	0.0502662	0.492226					FALSE
GLE1	0.0502672	0.184274					FALSE
WDR75	0.0503409	0.455827					FALSE
MRM1	0.0504443	0.468257					FALSE
PAEP	0.0504855	0.370873					FALSE
WBP1	0.0506201	0.315355					FALSE
DCAF12	0.0508015	0.410105					FALSE
MTHFD1L	0.0508308	0.313765					FALSE
VCY1B	0.0508694	0.302786					FALSE
ZNF696	0.0508729	0.468871	0.575839	0.763141			FALSE
PCF11	0.0509256	0.221538					FALSE
TNNC2	0.0509289	0.310103					FALSE
SCGB3A1	0.0509699	0.500909					FALSE
GCN1	0.050972	0.263266					FALSE
WARS	0.0509775	0.298376					FALSE
B3GALNT2	0.0511032	0.440052					FALSE
DUXA	0.0511136	0.225459					FALSE
SMPDL3A	0.0511606	0.223271					FALSE
GCSH	0.0511832	0.32207	0.731056	0.880826			FALSE
C19orf24	0.0511912	0.238545					FALSE
RAPGEF6	0.0512318	0.329716					FALSE
SLC2A11	0.0512728	0.330867					FALSE
ISM2	0.0512796	0.399463					FALSE
RTFDC1	0.0512799	0.376046					FALSE
MRTO4	0.0513222	0.567422					FALSE
STX5	0.0513379	0.715227	0.481971	0.876859			FALSE
PPP1R14A	0.0513535	0.336651					FALSE
NUDT7	0.0514035	0.381867					FALSE
TICAM1	0.0516102	0.311911					FALSE
CTNND1	0.0516722	0.309195					FALSE
VPS72	0.0516954	0.506369					FALSE
TMEM200A	0.0517119	0.305627					FALSE
ZNF527	0.0518057	0.325431					FALSE
C19orf54	0.0518431	0.420714					FALSE
FOXS1	0.0519397	0.351402					FALSE
UPK1A	0.0519703	0.521736					FALSE
TRIM7	0.0520424	0.201301					FALSE
SERPINA12	0.052056	0.290343					FALSE
PNMA2	0.0520982	0.347718					FALSE
ZBBX	0.0521289	0.278215					FALSE
ANLN	0.0521661	0.507558					FALSE
GPR78	0.0524032	0.393718	0.381752	0.658869			FALSE
SPOCK1	0.0525129	0.485432					FALSE
GSTP1	0.0525508	0.322426					FALSE
KRT10	0.0525578	0.268125					FALSE
MASTL	0.0526114	0.598097					FALSE
QSOX2	0.0528347	0.363233					FALSE
CREB3L3	0.0528817	0.471721					FALSE
BHLHA15	0.0528942	0.371889					FALSE
GIMAP1-GIMAP5	0.0529334	0.343895					FALSE
C16orf46	0.0529361	0.366133					FALSE
PLA2G16	0.052937	0.550986					FALSE
YARS	0.0530476	0.273082					FALSE
PDCD5	0.0530551	0.330546					FALSE
TRIAP1	0.0531032	0.371895					FALSE
LETM1	0.0531034	0.336065					FALSE
PCDHA2	0.0531649	0.367306					FALSE
TCP10L2	0.0532202	0.40549					FALSE
SEC61B	0.0532452	0.734497	0.17882	0.370325			FALSE
SOGA1	0.0533735	0.213113					FALSE
CDK2AP2	0.053401	0.225958					FALSE
PPIP5K1	0.0534151	0.437749					FALSE
LRRC57	0.0534415	0.211266					FALSE
SRXN1	0.0534669	0.289224					FALSE
TMEM71	0.0535021	0.377706					FALSE
SDF2L1	0.0536277	0.366669	0.690661	0.8829			FALSE
HEXIM2	0.0537592	0.463494					FALSE
SRF	0.053768	0.207747					FALSE
NARFL	0.0539563	0.22486					FALSE
OR10K1	0.0541041	0.220058					FALSE
ABCA5	0.0541044	0.544284					FALSE
CDHR3	0.0542521	0.27739					FALSE
FAM221A	0.0542869	0.564057					FALSE
NPL	0.0543003	0.385563					FALSE
NDUFS5	0.0543989	0.236854					FALSE
SFRP1	0.0544144	0.350633					FALSE
THEM6	0.0544194	0.507908	0.832077	0.951774			FALSE
ZNF251	0.0544453	0.384082					FALSE
PCGF2	0.0545192	0.290921					FALSE
SRSF3	0.0545455	0.397859	0.128107	0.30721			FALSE
HOXD10	0.0545964	0.295899					FALSE
C9orf64	0.054648	0.295927					FALSE
PSG8	0.0547161	0.316282					FALSE
MMP15	0.0547241	0.238919					FALSE
CNTFR	0.0548033	0.700477					FALSE
PGP	0.0548501	0.212943					FALSE
PPAN-P2RY11	0.0548753	0.293216					FALSE
RPL11	0.0548804	0.632067	0.648971	0.802869			FALSE
SACM1L	0.0549698	0.389037					FALSE
ZNF524	0.0550777	0.595939					FALSE
SLC6A1	0.0551188	0.53604					FALSE
ASNS	0.0551194	0.448083					FALSE
ROPN1L	0.0551225	0.252539					FALSE
GGNBP2	0.0551453	0.417907					FALSE
AQP7	0.0551483	0.354454					FALSE
KRTAP22-2	0.0552109	0.269742					FALSE
C16orf62	0.0552848	0.394549					FALSE
ZNF597	0.055305	0.36101					FALSE
VCPKMT	0.0553577	0.387115					FALSE
ENOX1	0.0555789	0.49417					FALSE
SLC25A44	0.0556233	0.350009					FALSE
UBA52	0.0557032	0.237974					FALSE
MAPKAPK2	0.0557484	0.363165	0.753584	0.931784			FALSE
ST6GALNAC6	0.0557736	0.394335					FALSE
KLF8	0.0558201	0.326018					FALSE
ACOX3	0.0558353	0.367446					FALSE
FRAT2	0.0558995	0.271199					FALSE
DNAJC27	0.0560026	0.283218					FALSE
IDH1	0.0560264	0.4682					FALSE
MEMO1	0.0561794	0.244038					FALSE
EXOSC10	0.0562749	0.626736					FALSE
GIMAP8	0.0562781	0.367674					FALSE
CPN2	0.0562825	0.351526					FALSE
HIST2H2BF	0.0563095	0.384887					FALSE
NHLH1	0.0563786	0.453413					FALSE
RPL3	0.0564306	0.4389	0.937272	0.982867			FALSE
DUSP3	0.056476	0.237781					FALSE
SIT1	0.0565323	0.331799					FALSE
CLCN5	0.0565491	0.536527					FALSE
CDC40	0.0566247	0.46588					FALSE
ZNF235	0.0566351	0.488307					FALSE
AQP5	0.0566445	0.615972					FALSE
IGBP1	0.0568117	0.292535					FALSE
KRTAP1-4	0.0569072	0.254957					FALSE
WSCD2	0.0570071	0.285909					FALSE
POLR2C	0.0570545	0.375749	0.489398	0.867368			FALSE
NUDT3	0.0570924	0.386794	0.147736	0.359539			FALSE
PCDHGB6	0.0572204	0.615142					FALSE
MED18	0.0575058	0.70604					FALSE
FARSB	0.0576142	0.195674	0.310603	0.626252			FALSE
CHN2	0.0577722	0.403941					FALSE
SAV1	0.0577777	0.276876					FALSE
RAB6A	0.0578704	0.342923					FALSE
DDX27	0.0579682	0.315717					FALSE
CDRT1	0.0580551	0.301274					FALSE
TRIM46	0.0580833	0.230706					FALSE
EPOP	0.0581564	0.266003					FALSE
SLC35F1	0.0581905	0.219095					FALSE
CCDC171	0.058209	0.307506					FALSE
MRPS23	0.058235	0.260682	0.470008	0.812393			FALSE
TRMT2A	0.0582374	0.600268					FALSE
EIF3D	0.0582844	0.271589	0.893404	0.96909			FALSE
COX4I1	0.0582978	0.577973					FALSE
CTAGE9	0.058313	0.25038					FALSE
MLX	0.0583151	0.279548					FALSE
SYNPO2	0.0583387	0.302225					FALSE
PAN3	0.0584688	0.45962					FALSE
DTL	0.0584982	0.358052					FALSE
HMGCR	0.0586054	0.215696					FALSE
CAPNS1	0.0587248	0.414517	0.912577	0.959815			FALSE
RNASEH2C	0.0588121	0.339486					FALSE
UTS2R	0.058846	0.407349					FALSE
EPHB6	0.0588618	0.288443					FALSE
ORAI2	0.0589419	0.21259					FALSE
C17orf58	0.0589686	0.654991					FALSE
TCEANC2	0.0590426	0.423235					FALSE
ADGRL2	0.0591363	0.326068					FALSE
ZXDB	0.0591406	0.308945					FALSE
RASSF5	0.0592575	0.687069					FALSE
F2R	0.0592577	0.23736					FALSE
NUTM2A	0.0593835	0.267147					FALSE
RPP30	0.0593965	0.283769					FALSE
FKBP3	0.0595228	0.652512					FALSE
FAM193B	0.0595291	0.557222					FALSE
OR4C3	0.0595452	0.397474					FALSE
ZNF425	0.0596026	0.477805					FALSE
TBCA	0.0596133	0.467685					FALSE
SELENOH	0.0596341	0.250252					FALSE
FAM102B	0.0596344	0.209829					FALSE
ASAP1	0.0597268	0.32573	0.901233	0.97619			FALSE
OR4C15	0.0598567	0.39769					FALSE
XAB2	0.0598613	0.438746					FALSE
FAH	0.0598649	0.389141					FALSE
PIGT	0.0599018	0.252816					FALSE
ANKRD13D	0.0599076	0.526884					FALSE
PSMB6	0.0599339	0.585958	0.684907	0.835405			FALSE
RCCD1	0.0599725	0.525553					FALSE
DNM1	0.0599753	0.302563					FALSE
MTERF4	0.0600405	0.80324					FALSE
SERPINF2	0.0600521	0.227184					FALSE
GCM1	0.0601119	0.359832					FALSE
TUBG2	0.0602521	0.480384					FALSE
OR10H1	0.0603047	0.302115					FALSE
ARPC2	0.0603917	0.311188					FALSE
RAB17	0.0604077	0.405589					FALSE
HSPA6	0.0604269	0.31022					FALSE
HOMER2	0.0604524	0.327175					FALSE
CLTCL1	0.060477	0.49033					FALSE
USP17L8	0.060697	0.278661					FALSE
FAM84A	0.0607857	0.429123					FALSE
RP1	0.0608252	0.315243					FALSE
DEFB107B	0.0608425	0.347956					FALSE
UBE2D3	0.060932	0.404618					FALSE
MLLT6	0.0609495	0.312832					FALSE
ANP32B	0.061113	0.291939	0.236388	0.50646			FALSE
GADD45GIP1	0.0611318	0.258758					FALSE
IKBKB	0.0612875	0.276132					FALSE
BOC	0.0613543	0.280144					FALSE
FGD5	0.0614843	0.42414					FALSE
TTK	0.0615851	0.216731					FALSE
MANSC1	0.0616172	0.233343					FALSE
ADRA1D	0.06162	0.301223					FALSE
UGT1A8	0.061622	0.376178					FALSE
IARS2	0.0616288	0.345264					FALSE
OR5L2	0.0617838	0.254934					FALSE
SMIM24	0.061832	0.28186					FALSE
AK4	0.0618595	0.277332					FALSE
PPP1R12A	0.0618741	0.390779					FALSE
IPO8	0.0618778	0.608685					FALSE
DNMT1	0.0619337	0.42854					FALSE
TLE2	0.0619408	0.66566					FALSE
ZNF449	0.0620065	0.294049					FALSE
DCTN6	0.0620573	0.35792					FALSE
CARF	0.0621215	0.580371					FALSE
SMAP2	0.0621373	0.48768					FALSE
GALNT18	0.0621725	0.338853					FALSE
ATP6V0E2	0.0623455	0.474118					FALSE
JPH4	0.0623707	0.513695					FALSE
OR1E1	0.0624057	0.369333					FALSE
GRIN3B	0.062418	0.282048					FALSE
TMEM57	0.0624218	0.470123					FALSE
TRIM32	0.0624436	0.605624					FALSE
TANK	0.0624936	0.60925					FALSE
MROH7	0.0625174	0.43822					FALSE
ARL15	0.0625457	0.49712					FALSE
SPTSSA	0.0625715	0.304493					FALSE
PTAR1	0.0625772	0.352888					FALSE
BANP	0.0626527	0.511312					FALSE
LPCAT2	0.0626909	0.414321					FALSE
SPPL2A	0.0627807	0.278134					FALSE
KCTD8	0.0627905	0.468738					FALSE
RAB10	0.0628456	0.446963					FALSE
DHDDS	0.0629032	0.293728					FALSE
PPP4R2	0.0629411	0.569984					FALSE
DTNB	0.0629876	0.460833					FALSE
C14orf178	0.0631297	0.41581	0.732227	0.918227			FALSE
TSHZ3	0.0631387	0.322189					FALSE
ZXDA	0.0631528	0.309627					FALSE
LRRD1	0.0631725	0.433768					FALSE
MSS51	0.0631817	0.457993					FALSE
KCNC2	0.063203	0.724395					FALSE
C14orf37	0.0632208	0.463148					FALSE
SNRPC	0.0632715	0.335237	0.247912	0.396257			FALSE
XYLT2	0.0633056	0.342917					FALSE
NUP58	0.0633293	0.362238					FALSE
SRP68	0.0633925	0.47597					FALSE
MYL3	0.0635878	0.431936					FALSE
BORCS8	0.0635958	0.347748					FALSE
CDT1	0.0636107	0.552607					FALSE
BLM	0.0637025	0.519667					FALSE
NECTIN2	0.0637029	0.333545					FALSE
CDK15	0.063765	0.300689					FALSE
LYPD6B	0.0637799	0.318651					FALSE
NKAIN4	0.0638203	0.403812					FALSE
TMEM132A	0.0639017	0.39889					FALSE
C17orf51	0.0639208	0.359055					FALSE
PGAM1	0.0641237	0.31089					FALSE
MRPL40	0.0641519	0.678181					FALSE
NIPAL2	0.0643502	0.492802					FALSE
ZNF160	0.0644616	0.399863					FALSE
NKAPL	0.0645423	0.208347					FALSE
PTX4	0.0645428	0.318637					FALSE
TMEM230	0.0645709	0.361687					FALSE
CST3	0.0646041	0.324641					FALSE
FBXO47	0.0647846	0.276372					FALSE
RGS14	0.0647891	0.309491					FALSE
HYPK	0.0649434	0.475671					FALSE
CCR2	0.0649792	0.61832					FALSE
CDC45	0.0650198	0.270961					FALSE
JMJD4	0.0650333	0.308854					FALSE
MRPS6	0.0650575	0.382528	0.85051	0.993258			FALSE
STRIP2	0.065079	0.398573					FALSE
RSL24D1	0.0651044	0.300634					FALSE
WDR70	0.065128	0.372441					FALSE
THAP10	0.0651697	0.774359					FALSE
NOC4L	0.065179	0.577712					FALSE
TRAF4	0.0653084	0.469778					FALSE
ARHGEF2	0.065332	0.295586	0.992289	1			FALSE
AGAP5	0.0653714	0.359109					FALSE
GGA2	0.0654551	0.373316					FALSE
PPP1R32	0.0656481	0.409807					FALSE
TMCO6	0.0657296	0.315394					FALSE
DUOX2	0.06573	0.402513					FALSE
KHDC1	0.0657418	0.660727					FALSE
JAG1	0.0657919	0.432835					FALSE
CD3EAP	0.0658364	0.397984					FALSE
ITGB7	0.0658869	0.376111					FALSE
CCT3	0.0659163	0.321393	0.675655	0.87511			FALSE
CEP192	0.0659743	0.387162					FALSE
GZMB	0.0660034	1					FALSE
NFE2L3	0.0660316	0.73468					FALSE
ARHGDIB	0.0660393	0.298649					FALSE
RALGPS2	0.0661656	0.252157					FALSE
CD247	0.0662236	0.195921					FALSE
LOXHD1	0.0662354	0.356124					FALSE
C12orf57	0.066237	0.330814					FALSE
APCS	0.0664556	0.444103					FALSE
MAP1LC3A	0.0664819	0.362677					FALSE
ZNF205	0.0665303	0.292022					FALSE
NPIPB9	0.0665569	0.41506					FALSE
BCAM	0.0666653	0.291517					FALSE
SRSF1	0.0668517	0.308351	0.10214	0.36645			FALSE
CSTF1	0.0668848	0.305218					FALSE
SIRT4	0.0670056	0.262532					FALSE
C19orf53	0.0670113	0.422575					FALSE
SLC33A1	0.0670342	0.613238					FALSE
PPP1R11	0.0670521	0.274081					FALSE
UBE2W	0.0671072	0.389719					FALSE
TMCO4	0.0671559	0.2487					FALSE
CCL4L2	0.0671928	0.373875					FALSE
SNAP91	0.0672111	0.341808					FALSE
CCDC180	0.0672358	0.449217					FALSE
SEMA4C	0.067238	0.257209					FALSE
COQ9	0.0673326	0.339568					FALSE
SHC1	0.0673368	0.288464					FALSE
DNASE2	0.0674666	0.30878					FALSE
CCDC114	0.0675436	0.419876					FALSE
CANT1	0.0676347	0.273871					FALSE
CHMP1B	0.067755	0.400479					FALSE
HTATSF1	0.0677704	0.2932					FALSE
SRSF6	0.0678217	0.435097	0.255647	0.49875			FALSE
ZNF510	0.0678319	0.304107					FALSE
SNRPE	0.0679026	0.380287	0.81723	0.926072			FALSE
SV2C	0.0679865	0.236531					FALSE
STX18	0.0680089	0.390691	0.0690394	0.169847			FALSE
CBFB	0.0680601	0.364974					FALSE
CNN1	0.0680731	0.476173					FALSE
HAGHL	0.068221	0.245373					FALSE
AZU1	0.0682524	0.617771					FALSE
CTGF	0.0682595	0.386712					FALSE
ALG13	0.0682821	0.471062					FALSE
TM9SF4	0.0683454	0.599152					FALSE
WDR86	0.068402	0.267079					FALSE
IL12A	0.0685234	0.268344					FALSE
TUBA3C	0.0685252	0.419774					FALSE
PLIN2	0.0686162	0.218747					FALSE
TBK1	0.0687058	0.632771					FALSE
FLI1	0.0687251	0.271723					FALSE
SIRT7	0.068772	0.3215					FALSE
AHCYL2	0.0687796	0.336698					FALSE
SLC1A4	0.0689996	0.307932					FALSE
GNL1	0.0691663	0.399646					FALSE
NUP155	0.069297	0.457268					FALSE
KRT8	0.069307	0.314529					FALSE
TGIF2-C20orf24	0.0693743	0.452967					FALSE
KIAA0232	0.0694103	0.495571					FALSE
FBXL6	0.0694427	0.54913					FALSE
C19orf12	0.0696069	0.457432					FALSE
SSFA2	0.0696107	0.268322					FALSE
ZNF486	0.0696551	0.290371					FALSE
TRIM50	0.0696557	0.550119					FALSE
RPL15	0.069761	0.527378	0.433202	0.734902			FALSE
ZFR2	0.0698281	0.32946					FALSE
TUBA1C	0.0698463	0.269705	0.0551505	0.285001			FALSE
LGALS7B	0.0699075	0.407718					FALSE
UFD1	0.0699089	0.309414					FALSE
GTF2IRD1	0.0699776	0.237693					FALSE
FAM117A	0.0699807	0.489579					FALSE
RASGEF1A	0.0700002	0.374003					FALSE
RABL6	0.0700055	0.260868					FALSE
CELA1	0.0700449	0.276251					FALSE
OR2M3	0.0700565	0.281364					FALSE
C9orf24	0.0700601	0.395318					FALSE
WBP11	0.0700729	0.247398					FALSE
PLCXD2	0.0700785	0.550846					FALSE
SURF2	0.070244	0.272789					FALSE
OR10H2	0.0703879	0.733723					FALSE
ZSWIM5	0.0704087	0.45061					FALSE
LGALS9	0.0704238	0.258565	0.716379	0.960758			FALSE
KIAA0100	0.0705332	0.315411					FALSE
NEURL1B	0.0705635	0.525897					FALSE
EGLN1	0.0705639	0.605404					FALSE
COQ8B	0.070618	0.559296					FALSE
BCAN	0.0706544	0.64077					FALSE
PERP	0.0706578	0.471432					FALSE
BCL2L11	0.0707845	0.67443					FALSE
TMEM106A	0.0708952	0.423055					FALSE
GHRL	0.0709117	0.389613					FALSE
NEK2	0.0709256	0.429343					FALSE
LAPTM4A	0.0710697	0.249772					FALSE
EHD1	0.0710954	0.453405					FALSE
FHOD3	0.0711258	0.655183					FALSE
OR8B12	0.0711481	0.390291					FALSE
CENPX	0.0711527	0.381929					FALSE
SOCS4	0.0712041	0.322259					FALSE
CTF1	0.0713103	0.583837					FALSE
OTUD3	0.0713465	0.290302					FALSE
C9orf170	0.0713473	0.303775					FALSE
HES2	0.0714127	0.411613					FALSE
COMP	0.0714768	0.644375					FALSE
RPL18A	0.0714776	0.275868	0.977637	0.990063			FALSE
RAB2A	0.0715512	1					FALSE
EXOSC8	0.0715551	0.29378					FALSE
BUD31	0.0716229	0.584156					FALSE
OR2J2	0.0717342	0.376323					FALSE
PSRC1	0.0718987	0.307587					FALSE
PCDHA4	0.0719428	0.616405					FALSE
VEGFB	0.071991	0.30536					FALSE
IPO5	0.072068	0.316465	0.811818	0.879422			FALSE
DAZL	0.0720786	0.328415					FALSE
SLC27A1	0.0720845	0.608667					FALSE
ABHD17A	0.0721385	0.530834					FALSE
CLUAP1	0.0722046	0.484107					FALSE
CEBPE	0.072222	0.418474					FALSE
LRP3	0.0722517	0.61184					FALSE
MVB12A	0.072261	0.215395					FALSE
CACNA2D1	0.0724415	0.388796					FALSE
ADAMTS7	0.0725741	0.437971					FALSE
HFM1	0.0725851	0.406745					FALSE
FADD	0.0726254	0.302521					FALSE
TOR1B	0.0727528	0.465518					FALSE
METAP2	0.0727583	0.276146					FALSE
CACNA1G	0.0727608	0.222735					FALSE
SPATA13	0.0727908	0.387997					FALSE
CD320	0.072837	0.755026					FALSE
PMEL	0.072873	0.475188					FALSE
YIPF4	0.0729266	0.412108					FALSE
SLC30A5	0.0729488	0.359208					FALSE
UNK	0.0729563	0.432078					FALSE
FANCM	0.0731417	0.652021					FALSE
ATOX1	0.0731763	0.35954					FALSE
APOBEC3B	0.0731802	0.318695					FALSE
BLOC1S4	0.0732779	0.251277					FALSE
CDC25B	0.0733046	0.349712					FALSE
PLK1	0.0733487	0.348932					FALSE
NCAPG	0.0733514	0.550929					FALSE
NKX6-2	0.0733711	0.721537					FALSE
NUP93	0.0735399	0.563637	0.379546	0.641466			FALSE
ZNF276	0.0736085	0.255816					FALSE
ZBTB39	0.0736194	0.477456					FALSE
ARAP1	0.0736804	0.525343					FALSE
NFKBIB	0.0736935	0.570658					FALSE
OLFML3	0.0737058	0.753888					FALSE
OR8K5	0.0737379	0.478872					FALSE
NAT8L	0.0737888	0.314693					FALSE
SAMD12	0.0738504	0.460997					FALSE
SPATA33	0.0738579	0.600381					FALSE
PTPRF	0.0739492	0.352696					FALSE
BDP1	0.0739983	0.255782					FALSE
DDB1	0.0740607	0.511712	0.350515	0.575737			FALSE
RAB11B	0.0740716	0.540297					FALSE
TCFL5	0.0741016	0.460445					FALSE
GTF2IRD2B	0.0742177	0.366859					FALSE
RUNDC3A	0.074237	0.402576					FALSE
BOD1L2	0.0742635	0.419304					FALSE
ZNF250	0.0743246	0.468117					FALSE
FES	0.074337	0.3752					FALSE
UBE2N	0.0743412	0.518439					FALSE
METRNL	0.0743656	0.387736					FALSE
CNOT4	0.0743904	0.285488					FALSE
PSMD1	0.0745102	0.260871	0.524176	0.916206			FALSE
PLEKHG6	0.074558	0.549024					FALSE
ZNF273	0.0746103	0.715917					FALSE
CDK5RAP2	0.0746408	0.323952					FALSE
UBXN4	0.0746703	0.66091					FALSE
PSMG4	0.0746898	0.294854					FALSE
DHRS4L2	0.074839	0.367587					FALSE
NAE1	0.0748937	0.34726					FALSE
CMTM6	0.0749022	0.233912					FALSE
NUP50	0.0749059	0.380899					FALSE
RNF216	0.0749212	0.259058					FALSE
AXL	0.0749387	0.770922					FALSE
USP34	0.0749568	0.260539					FALSE
FA2H	0.0749724	0.469625					FALSE
CHTOP	0.0749731	0.371138					FALSE
ZNHIT3	0.0749792	0.376097					FALSE
BCL9	0.0752358	0.208997					FALSE
HIF1AN	0.0752647	0.392096					FALSE
MRPL58	0.0752884	0.346119					FALSE
LYPLA2	0.0754584	0.429714					FALSE
TTC1	0.0755237	0.524708					FALSE
TNFRSF8	0.0755331	0.233887					FALSE
ZC3H7A	0.0755414	0.37004					FALSE
CCDC88B	0.0755539	0.470267					FALSE
RC3H1	0.0756196	0.199303					FALSE
RPL10	0.0756544	0.365581	0.5563	0.911713			FALSE
SFXN5	0.0756672	0.341542					FALSE
RPL23	0.0756779	0.369468	0.445345	0.747907			FALSE
TNPO3	0.0757148	0.298797	0.631493	0.953724			FALSE
RAB33B	0.0757149	0.466561					FALSE
USP33	0.0757555	0.391368					FALSE
PRSS53	0.0758445	1					FALSE
POLR1A	0.0758948	0.283407					FALSE
MAPK6	0.0759053	0.503882					FALSE
HSPA9	0.0759968	0.671927					FALSE
SMURF2	0.0760035	0.395088					FALSE
CXCR5	0.07605	0.644832					FALSE
SLC8A3	0.0760746	0.474476					FALSE
MTO1	0.0764535	0.416521					FALSE
ZNF317	0.0764582	0.530071					FALSE
OR14I1	0.0764693	0.347548					FALSE
FAM186B	0.0764804	0.624373					FALSE
FOXM1	0.0764863	0.386861					FALSE
KLC2	0.0764913	0.328782					FALSE
DYNLL1	0.076569	0.282972	0.815675	0.918371			FALSE
LRRC3C	0.0766078	0.262652					FALSE
PRPF19	0.0767152	0.338173	0.226699	0.69027			FALSE
CDK7	0.0767654	0.366065					FALSE
ZC3H8	0.0769852	0.320159					FALSE
FSCN1	0.0770301	0.375993					FALSE
YPEL3	0.0770464	0.735645					FALSE
TMIGD1	0.0770619	0.208711					FALSE
EDEM1	0.0771552	0.778129					FALSE
LRRC37A3	0.0771585	0.268796					FALSE
SSPN	0.0771731	0.371512					FALSE
ERC1	0.0772416	0.471538					FALSE
KLHDC4	0.0773002	0.472407					FALSE
PRC1	0.077333	0.526941	0.345854	0.797174			FALSE
ZFHX4	0.0773721	1					FALSE
LRP5L	0.077404	0.263333					FALSE
TECRL	0.0774375	0.764094					FALSE
ABHD16B	0.077488	0.264193					FALSE
DIMT1	0.0775173	0.56302	0.842563	0.941039			FALSE
LINC02210-CRHR1	0.0775196	0.406562					FALSE
ZFP1	0.0775702	0.335298					FALSE
EYA2	0.0775765	0.352866					FALSE
CTR9	0.0775903	0.794621					FALSE
PDIA6	0.0776369	0.56022					FALSE
DYNC1I2	0.0776951	0.398581					FALSE
HOXB3	0.0778049	0.451646					FALSE
MUC7	0.0778383	0.450295					FALSE
DNAJC11	0.0778569	0.406017	0.683822	0.965333			FALSE
RPA1	0.0779047	0.316295					FALSE
FICD	0.0779538	0.272617					FALSE
HIST1H4G	0.0779582	0.431514					FALSE
NECTIN3	0.0779922	0.735361					FALSE
SUPT16H	0.0780379	0.662596	0.982872	0.995099			FALSE
ZBTB47	0.0780965	0.339557					FALSE
SSBP3	0.0782201	0.29136					FALSE
C4orf32	0.0782781	0.551008					FALSE
SSH3	0.0785678	0.505021					FALSE
SNRPG	0.078603	0.483838					FALSE
TSPAN14	0.0786656	0.352374					FALSE
CNTN4	0.0786716	0.446488					FALSE
NRBP1	0.0787619	0.441085					FALSE
POLR3E	0.0788787	0.394002					FALSE
IPO11	0.0788871	0.343337	0.716173	0.9133			FALSE
ZWINT	0.0789073	0.397886					FALSE
DERL2	0.0790478	0.614034					FALSE
EDRF1	0.0790931	0.278262					FALSE
SECISBP2L	0.0791496	0.561245					FALSE
CDC7	0.0791906	0.595147					FALSE
ALG5	0.079271	0.691452					FALSE
BBOF1	0.0792955	0.503631					FALSE
NAT14	0.0793333	0.425458					FALSE
MT2A	0.0794022	0.382004					FALSE
SRMS	0.0794193	0.378872					FALSE
GALR3	0.0794225	0.312567					FALSE
C9orf50	0.0794483	0.324175					FALSE
OBP2B	0.0795068	0.330408					FALSE
CYP27B1	0.0795118	0.35853					FALSE
THBD	0.0796574	0.554448					FALSE
CEP89	0.0796657	0.467504					FALSE
EPS8L1	0.0799524	0.667666					FALSE
GTF2H4	0.080081	0.356743					FALSE
PSPC1	0.0801626	0.663514					FALSE
KCNC4	0.0802078	0.41547					FALSE
GFRA4	0.0803455	0.438662					FALSE
TBCB	0.0803822	0.315565					FALSE
LEPROTL1	0.0804634	0.654479					FALSE
KIAA1217	0.0804696	0.870147					FALSE
MAD2L2	0.0805442	0.367687					FALSE
MRPL45	0.0805486	0.376385					FALSE
CHRNA10	0.0805609	0.470699					FALSE
PINK1	0.0805859	0.359891					FALSE
ARL6IP1	0.0806807	0.71845					FALSE
PROX2	0.0807681	0.462986					FALSE
CDH18	0.0807961	0.43995					FALSE
HIST1H2BD	0.0808671	0.359452					FALSE
RAB22A	0.0808909	0.495787					FALSE
NPAP1	0.0810148	0.370324					FALSE
CCDC12	0.0810855	0.6898					FALSE
TEX2	0.0811157	0.362048					FALSE
ZNF91	0.0811603	0.4074					FALSE
ATG4A	0.0811677	0.546936					FALSE
2006-03-01	0.0811933	0.299426					FALSE
FGG	0.0811962	0.418838					FALSE
RGS5	0.081197	0.381483					FALSE
AKAP17A	0.0812082	0.320271					FALSE
THEMIS2	0.0812312	0.353392					FALSE
ANKRD34A	0.0812331	0.297632					FALSE
INPP5E	0.0812463	0.272249					FALSE
MYC	0.081318	0.418287					FALSE
GYPB	0.0813294	0.539839	0.674145	0.884729			FALSE
SLC9A4	0.0813881	0.458204					FALSE
ACTN4	0.081457	0.467286	0.529506	0.85025			FALSE
GCNT2	0.0814677	0.713421					FALSE
ATP2B3	0.0814743	0.456307					FALSE
DNAH11	0.0815713	0.427507					FALSE
YBX2	0.0816626	0.549545					FALSE
HSPB9	0.0816794	0.373717					FALSE
PEBP1	0.0818585	0.427					FALSE
PPM1N	0.0818899	0.305508					FALSE
CHCHD1	0.0819941	0.360777					FALSE
CDK12	0.0820167	0.29736					FALSE
HES5	0.0820702	0.331679					FALSE
MFSD13A	0.0820831	0.372018					FALSE
GPX4	0.0821726	0.44746					FALSE
HTRA4	0.0822693	0.317679					FALSE
ISL2	0.0822763	0.478394					FALSE
CPLX3	0.0824983	0.311249					FALSE
SNRNP35	0.0825551	0.294378					FALSE
SPTLC2	0.0825704	0.520506	1	1			FALSE
DHX58	0.0826758	0.419177					FALSE
TARS	0.0827989	0.283396					FALSE
NUDT8	0.0828203	0.425109					FALSE
ESRRG	0.0829017	0.493495					FALSE
ARMC7	0.0829154	0.403473					FALSE
THRSP	0.0829208	0.457171					FALSE
OR6C1	0.0829245	0.6545					FALSE
TGM1	0.0831996	0.410276					FALSE
RANBP1	0.0832419	0.455722	0.596531	0.812556			FALSE
C15orf40	0.0833518	0.280428					FALSE
HFE2	0.0834042	0.416851					FALSE
SLC35F6	0.0834916	0.614106					FALSE
WDR62	0.0835693	0.420388					FALSE
DCHS1	0.0836274	0.861548					FALSE
MAP3K19	0.0836942	0.272438					FALSE
RPL35A	0.0837682	0.569566	0.853005	0.966042			FALSE
NUP62CL	0.0838047	0.565399					FALSE
CNOT3	0.0838387	0.388299					FALSE
GPX2	0.0840068	0.340477					FALSE
C2CD4D	0.0840894	0.271392					FALSE
MED14	0.0841527	0.515116					FALSE
EGFL8	0.0842151	0.388983					FALSE
ZNF551	0.0842627	0.522185					FALSE
FBXW9	0.0843021	0.239351					FALSE
EBPL	0.0843242	0.508384					FALSE
GIPC1	0.0843631	0.528747	0.98043	1			FALSE
ASAH2	0.0844228	0.628404					FALSE
TRAPPC2	0.0844574	0.86408	0.544286	0.835754			FALSE
ITPA	0.0844756	0.403149					FALSE
GCNT4	0.0845393	0.302408					FALSE
SRRM1	0.0845953	0.835436					FALSE
KANK4	0.0846236	0.393597					FALSE
IGFBP5	0.0846584	0.353111					FALSE
MYO16	0.0846609	0.559106					FALSE
PSMF1	0.0846851	0.326949					FALSE
PLK2	0.0847155	0.63983					FALSE
ALG3	0.0847907	0.758669					FALSE
COL22A1	0.0848051	0.467885					FALSE
AQP12B	0.084819	0.655998					FALSE
RASL10A	0.084869	0.354188					FALSE
CARS	0.0848733	0.453889					FALSE
CES1	0.0849139	0.487855					FALSE
ZNF207	0.0850054	0.302372					FALSE
DNAAF3	0.0850219	0.76288					FALSE
TRIM4	0.0850694	0.542046					FALSE
SMG1	0.0850832	0.708711					FALSE
DMRTA1	0.0851085	0.317545					FALSE
COX17	0.085129	0.311026					FALSE
CLASRP	0.0851675	0.391139					FALSE
CUEDC2	0.085285	0.458472					FALSE
PSMD4	0.0852914	0.294769	0.934374	1			FALSE
POLD1	0.0853666	0.432164					FALSE
UBAP1L	0.0855523	0.393274					FALSE
NEUROG3	0.085625	0.374793					FALSE
GABRG3	0.0856741	0.311368					FALSE
PTGES2	0.0856874	0.542825					FALSE
ZNF492	0.0857027	0.576066					FALSE
SPATS1	0.0857604	0.659305					FALSE
ELP4	0.0857676	0.474535					FALSE
TMSB10	0.0858542	0.422832					FALSE
PPP1R10	0.0858965	0.393697					FALSE
TATDN2	0.0861305	0.355814					FALSE
SAE1	0.0862068	0.297119	0.383374	0.729803			FALSE
DDHD2	0.0862784	0.630015					FALSE
HNRNPC	0.0863593	0.359368	0.0537289	0.193948			FALSE
OR5A2	0.086362	0.543785					FALSE
TRIM56	0.0864405	0.44076					FALSE
MAP1LC3B	0.086484	0.541944	0.50285	0.738144			FALSE
REG1A	0.0864877	0.416834					FALSE
OTOP2	0.0865281	0.219522					FALSE
ZNF75D	0.0865614	0.508673					FALSE
NAGPA	0.0867051	0.312842					FALSE
PSG7	0.0868001	0.529806					FALSE
NDUFV2	0.0868325	0.566671					FALSE
AKNA	0.086841	0.590968					FALSE
CSGALNACT1	0.0868739	0.539949					FALSE
RNF123	0.0868769	0.445979					FALSE
AP3D1	0.0869448	0.558043					FALSE
WDR33	0.08698	0.457096					FALSE
ZNF189	0.0869802	0.488483					FALSE
SNRPN	0.0869842	0.417231					FALSE
DGKG	0.0870331	0.519803					FALSE
KREMEN1	0.0871089	0.394732					FALSE
C15orf65	0.0871893	0.723538					FALSE
FGFR1OP	0.0872199	0.386101					FALSE
NKX2-1	0.0872692	0.433553					FALSE
EIF2B5	0.087276	0.67441	0.989224	1			FALSE
RYR1	0.0873822	0.503174					FALSE
IL2RB	0.0874202	0.759497					FALSE
GTF3C4	0.0876345	0.536895					FALSE
TTC39C	0.0876671	0.504568					FALSE
HNRNPU	0.0876858	0.397616	0.271424	0.495203			FALSE
OR5B2	0.0876922	0.356158					FALSE
PFN4	0.087715	0.567447					FALSE
TLX2	0.0877273	0.457497					FALSE
BIRC3	0.0877684	0.390298					FALSE
CIC	0.087798	0.382671					FALSE
POLR2A	0.0878292	0.398901					FALSE
OR4F3	0.0878687	0.561824					FALSE
MED4	0.0879962	0.497135					FALSE
MBD2	0.0880328	0.450358					FALSE
FAM193A	0.0880876	0.598138					FALSE
ZNF260	0.0881005	0.737639					FALSE
INSM2	0.0881332	0.573305					FALSE
SLC12A6	0.0882637	0.249879					FALSE
CLDN7	0.0882806	0.465549					FALSE
SLC35A2	0.08838	0.29612					FALSE
CXCL3	0.0883976	0.67533					FALSE
C16orf52	0.0884599	0.380993					FALSE
PITPNM3	0.0886768	0.396274					FALSE
KCNK3	0.0886944	0.401579					FALSE
RSRP1	0.0888288	0.306708					FALSE
USPL1	0.0890563	0.331799					FALSE
ERG	0.0890722	0.295797					FALSE
PDAP1	0.0891153	0.234247					FALSE
SLC12A2	0.0891616	0.393803					FALSE
ABCC10	0.0891861	0.315326					FALSE
CCT8	0.0892575	0.341563	0.509782	0.756278			FALSE
ABLIM2	0.0894273	0.505791					FALSE
CDX1	0.0894392	0.370907					FALSE
NAA30	0.0894466	0.667509					FALSE
PKDCC	0.0894874	0.523745					FALSE
SQLE	0.0895565	0.664184					FALSE
FBP1	0.089659	0.540614					FALSE
IL17C	0.089681	0.483629					FALSE
PUF60	0.0897257	0.318024					FALSE
ADAMTS8	0.0897975	0.390394					FALSE
PRMT8	0.0898011	0.496261					FALSE
KCTD5	0.0898088	0.435612					FALSE
UCN	0.0898205	0.545513					FALSE
KIAA1211L	0.0898438	0.261897					FALSE
C17orf98	0.089874	0.416016					FALSE
SMG9	0.0898858	0.398203					FALSE
LRRCC1	0.0899059	0.595056					FALSE
PCOLCE	0.0900047	0.386669					FALSE
CKAP2	0.0900274	0.337881					FALSE
GHRH	0.0901046	0.470581					FALSE
RPS15A	0.0901279	0.398953	0.61772	0.82816			FALSE
EIF3M	0.0901326	0.396884	0.801068	0.891982			FALSE
LARS	0.09015	0.425013	0.509312	0.753615			FALSE
INSM1	0.0901615	0.479292					FALSE
ABCC5	0.0902109	0.41082					FALSE
CCDC87	0.0902241	0.534642					FALSE
RAB5A	0.0902465	0.363833	0.3604	0.601091			FALSE
CATSPERD	0.0903305	0.259471					FALSE
WTAP	0.090366	0.526788					FALSE
SNX14	0.0904517	0.314767					FALSE
LIPT1	0.0904915	0.47919					FALSE
ARFRP1	0.0905894	0.472347					FALSE
ZPR1	0.0906781	0.397468					FALSE
RFT1	0.0907355	0.413266					FALSE
TXLNG	0.0907746	0.54141					FALSE
KLF1	0.0908059	0.320062					FALSE
NUDT5	0.090806	0.608019					FALSE
EPRS	0.0908578	0.397363	0.361619	0.679887			FALSE
MST1L	0.0909527	0.438955					FALSE
IRS2	0.0911012	0.529553					FALSE
PLXNA4	0.0911485	0.490784					FALSE
SIGLEC1	0.0911943	0.528183					FALSE
RNASEH1	0.091227	0.340631					FALSE
C16orf95	0.0913624	0.428956					FALSE
SLAIN1	0.0913889	0.770065					FALSE
TMEM240	0.0914228	0.648505					FALSE
DUSP28	0.0914712	0.2737					FALSE
PTPDC1	0.0915822	0.306413					FALSE
ARHGEF10L	0.0916542	0.735095					FALSE
RBCK1	0.091693	0.35226					FALSE
SUN3	0.0916956	0.477896					FALSE
MTPAP	0.0917498	0.375784					FALSE
BARHL2	0.0917761	0.422956					FALSE
ALDH5A1	0.091823	0.52702					FALSE
DDX10	0.0919365	0.373937					FALSE
DHX8	0.0919495	0.39101	0.109553	0.371486			FALSE
PLGLB2	0.0919782	0.38231					FALSE
FABP5	0.0920673	0.669036	0.953853	0.989675			FALSE
MAB21L3	0.0920979	0.511258					FALSE
[truncated: 16,292 more rows]
